# Supplementary material
Source: MDPI journal article supplement (https://www.mdpi.com/2304-6740/11/3/127)
Supplement: s1 [file s1]

# Supplementary Materials

to the article

## Half-Sandwich Nickelacarboranes Derived from [7-(MeO(CH<sub>2</sub>)<sub>2</sub>S)-7,8-C<sub>2</sub>B<sub>9</sub>H<sub>11</sub>]<sup>-</sup>

Dmitriy K. Semyonov <sup>1,2</sup>, Marina Yu. Stogniy <sup>1,2\*</sup>, Kyrill Yu. Suponitsky <sup>3</sup> and Igor B. Sivaev <sup>1,4</sup>

<sup>1</sup> A. N. Nesmeyanov Institute of Organoelement Compounds, Russian Academy of Sciences, 28 Vavilov Str., 119334, Moscow, Russia; dksemyonov@mail.ru (D.K.S.); stogniy@ineos.ac.ru (M.Y.S.); sivaev@ineos.ac.ru (I.B.S.);

<sup>2</sup> M. V. Lomonosov Institute of Fine Chemical Technology, MIREA - Russian Technological University, 86 Vernadsky Av., 119571, Moscow, Russia;

<sup>3</sup> N. S. Kurnakov Institute of General and Inorganic Chemistry, Russian Academy of Sciences, 31 Leninskii Av., 119991, Moscow, Russia; kirshik@yahoo.com (K.Y.S.);

<sup>4</sup> Basic Department of Chemistry of Innovative Materials and Technologies, G.V. Plekhanov Russian University of Economics, 36 Stremyannyi Line, 117997 Moscow, Russia

\* Correspondence: stogniy@ineos.ac.ru

Single crystal X-ray diffraction experiment was carried out using SMART APEX2 CCD diffractometer ( $\lambda(\text{Mo-K}\alpha) = 0.71073 \text{ \AA}$ , graphite monochromator,  $\omega$ -scans) at 120 K. Collected data were processed by the SAINT and SADABS programs incorporated into the APEX2 program package [1]. The structure was solved by the direct methods and refined by the full-matrix least-squares procedure against  $F^2$  in anisotropic approximation. The refinement was carried out with the SHELXTL program [2].

### References

1. APEX2 and SAINT; Bruker AXS Inc.: Madison, WI, USA, **2014**.
2. Sheldrick, G.M. Crystal structure refinement with SHELXL. *Acta Cryst. C* **2015**, *71*, 3-8. DOI: 10.1107/S2053229614024218

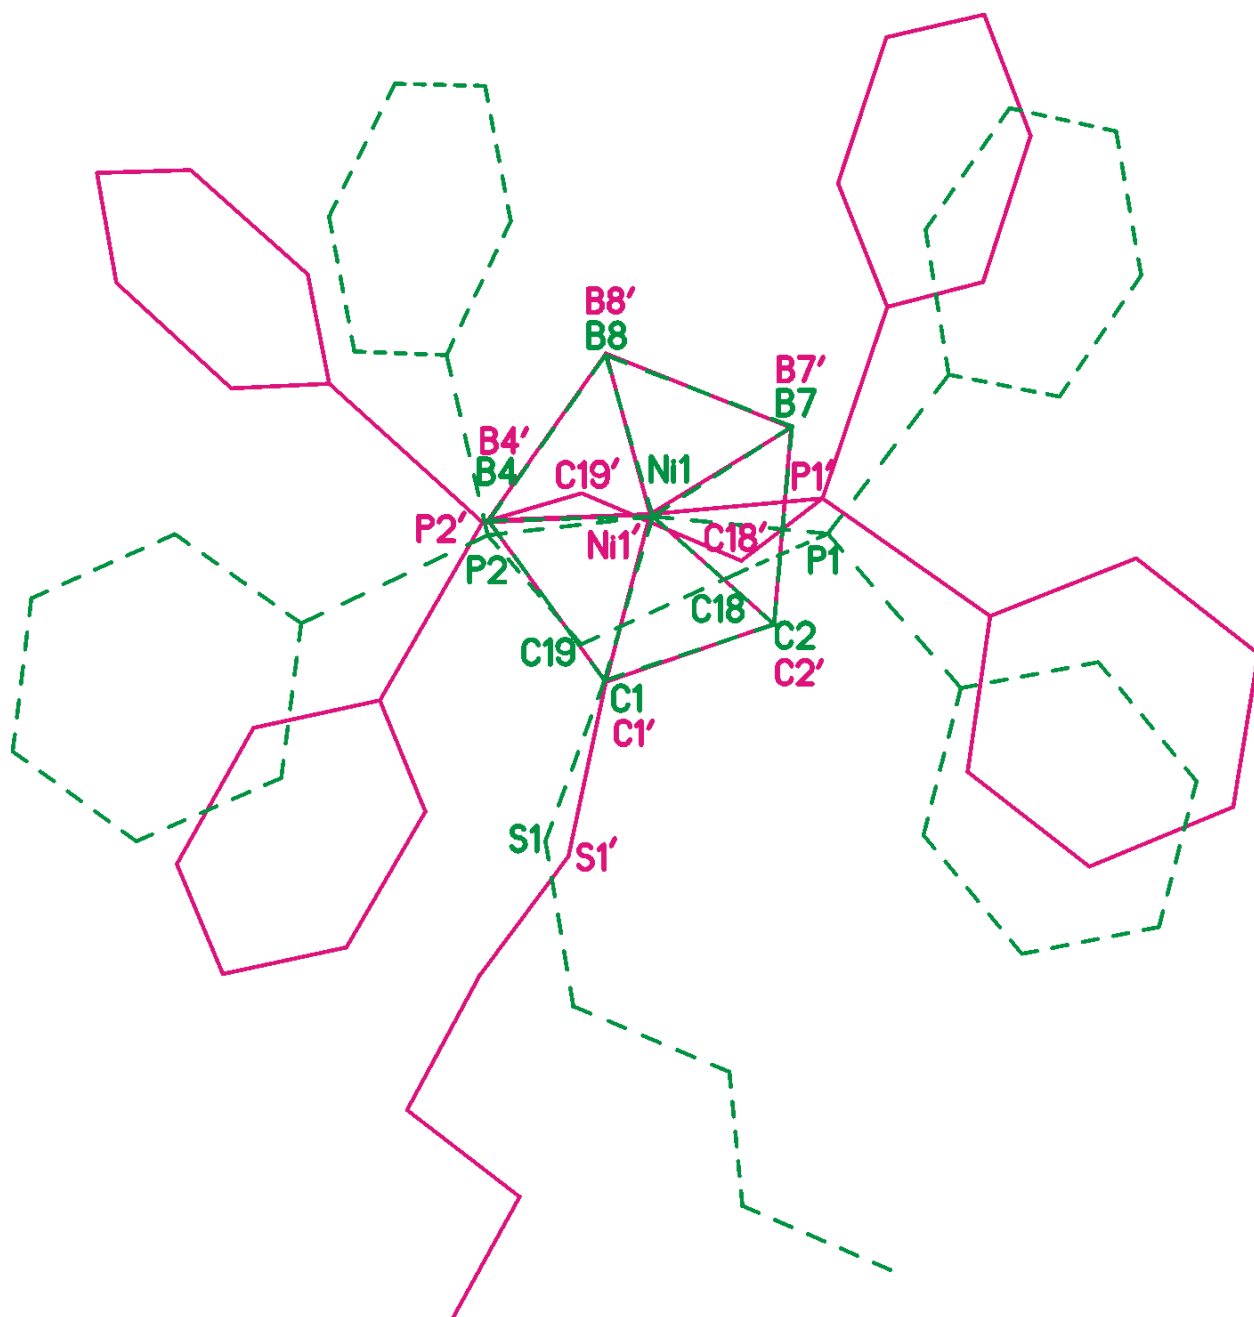

**Fig. S1.** Superimposition of the coordination environment of the nickel atom in two independent molecules in complexes **5**, showing the difference in the relative orientation of the ligands.

**Table 1S.** Crystallographic data for compound **5**.

|                                                    | Compound <b>5</b>                                                                                      |
|----------------------------------------------------|--------------------------------------------------------------------------------------------------------|
| formula                                            | C <sub>31</sub> H <sub>41</sub> B <sub>9</sub> NiOSP <sub>2</sub> 0.5(C <sub>3</sub> H <sub>6</sub> O) |
| fw                                                 | 708.76                                                                                                 |
| crystal system                                     | Triclinic                                                                                              |
| space group                                        | <i>P</i> -1                                                                                            |
| <i>a</i> , Å                                       | 12.3355(7)                                                                                             |
| <i>b</i> , Å                                       | 12.7617(7)                                                                                             |
| <i>c</i> , Å                                       | 23.3086(12)                                                                                            |
| $\alpha$ , deg.                                    | 94.623(2)                                                                                              |
| $\beta$ , deg.                                     | 95.020(2)                                                                                              |
| $\gamma$ , deg.                                    | 94.286(2)                                                                                              |
| <i>V</i> , Å <sup>3</sup>                          | 3630.9(3)                                                                                              |
| <i>Z</i>                                           | 4                                                                                                      |
| $\rho_{\text{calc}}$ , g·cm <sup>-3</sup>          | 1.296                                                                                                  |
| F(000)                                             | 1480                                                                                                   |
| $\mu$ , mm <sup>-1</sup>                           | 0.709                                                                                                  |
| $\theta$ range, deg.                               | 0.88 – 26.07                                                                                           |
| independent reflections                            | 14295                                                                                                  |
| Completeness to theta $\theta$ , %                 | 99.4                                                                                                   |
| refined parameters                                 | 931                                                                                                    |
| <i>GOF</i> ( <i>F</i> <sup>2</sup> )               | 1.051                                                                                                  |
| reflections with $I > 2\sigma(I)$                  | 11059                                                                                                  |
| $R_1(F)$ ( $I > 2\sigma(I)$ ) <sup>a</sup>         | 0.0377                                                                                                 |
| $wR_2(F^2)$ (all data) <sup>b</sup>                | 0.0876                                                                                                 |
| Largest diff. peak/hole, <i>e</i> ·Å <sup>-3</sup> | 0.398/-0.383                                                                                           |

<sup>a</sup>  $R_1 = \sum |F_o - |F_c|| / \sum (F_o)$ ; <sup>b</sup>  $wR_2 = (\sum [w(F_o^2 - F_c^2)^2] / \sum [w(F_o^2)^2])^{1/2}$

The NMR spectra at 400.1 MHz ( $^1\text{H}$ ), 128.4 MHz ( $^{11}\text{B}$ ), 100.0 MHz ( $^{13}\text{C}$ ) and 162 MHz ( $^{31}\text{P}$ ) were recorded with a Varian Inova 400 spectrometer. The residual signal of the NMR solvent relative to tetramethylsilane was taken as an internal reference for  $^1\text{H}$  and  $^{13}\text{C}$  NMR spectra.  $^{11}\text{B}$  NMR spectra were referenced using  $\text{BF}_3\cdot\text{Et}_2\text{O}$  as an external standard.  $^{31}\text{P}$  NMR spectra are cited relative 85%  $\text{H}_3\text{PO}_4$  as an external standard. Infrared spectra were recorded on a FSM-2201 (INFRASPEC) instrument. UV/Vis spectra were recorded with SF-2000 spectrophotometer (OKB SPECTR LLC) using 1 cm cuvettes. High resolution mass spectra (HRMS) were measured on a Bruker micrOTOF II instrument using electrospray ionization (ESI).

**Spectral data for 1-(MeO(CH<sub>2</sub>)<sub>2</sub>S)-1,2-C<sub>2</sub>B<sub>10</sub>H<sub>11</sub> (1)**

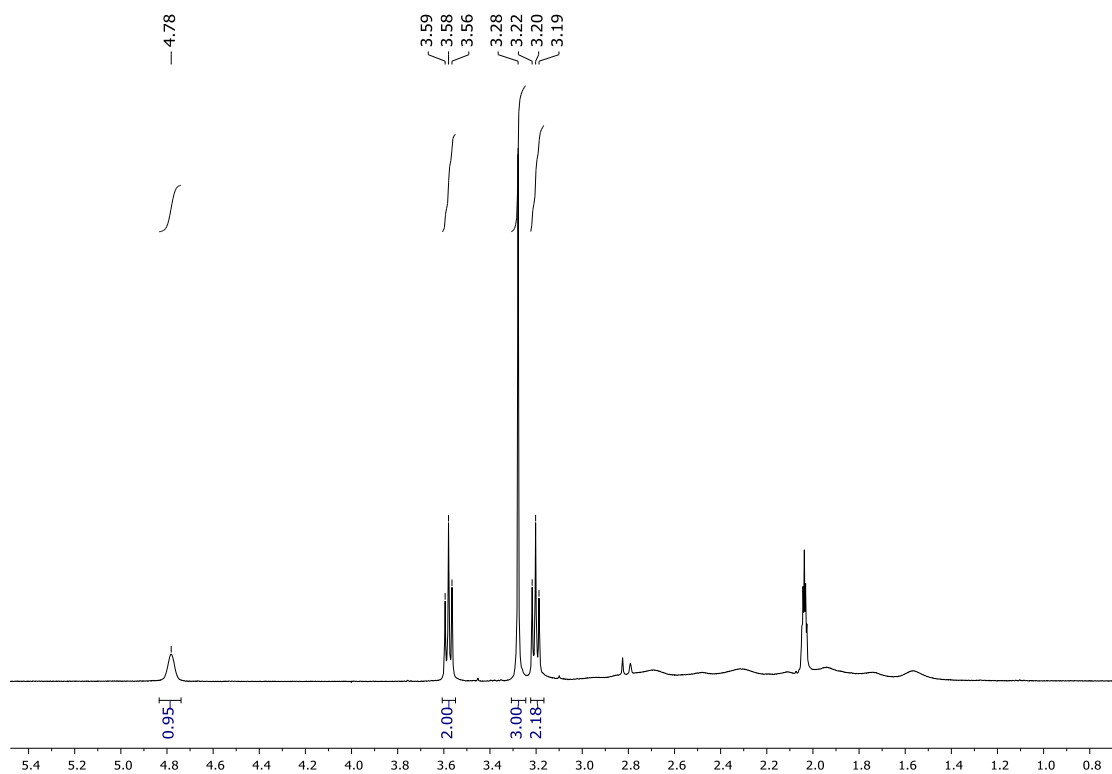

**Fig. S2.** <sup>1</sup>H NMR spectrum of compound **1** in acetone-d<sub>6</sub>

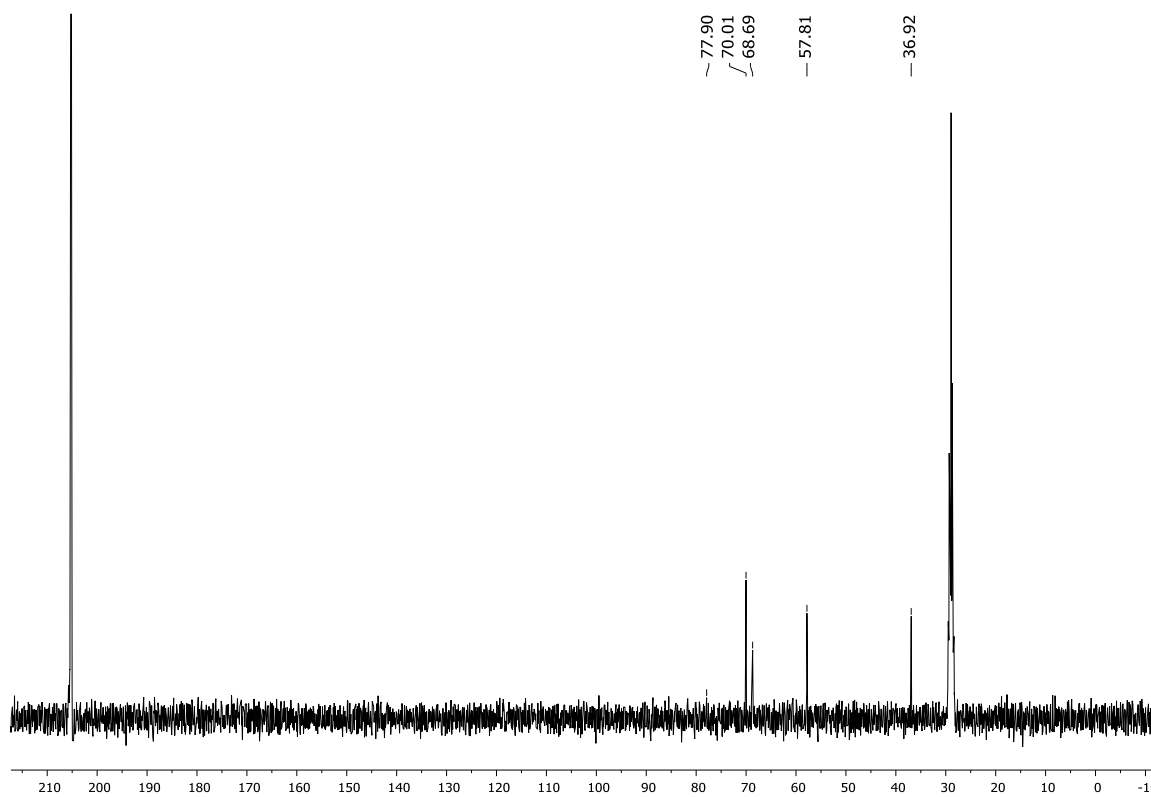

**Fig. S3.** <sup>13</sup>C NMR of compound **1** in acetone-d<sub>6</sub>

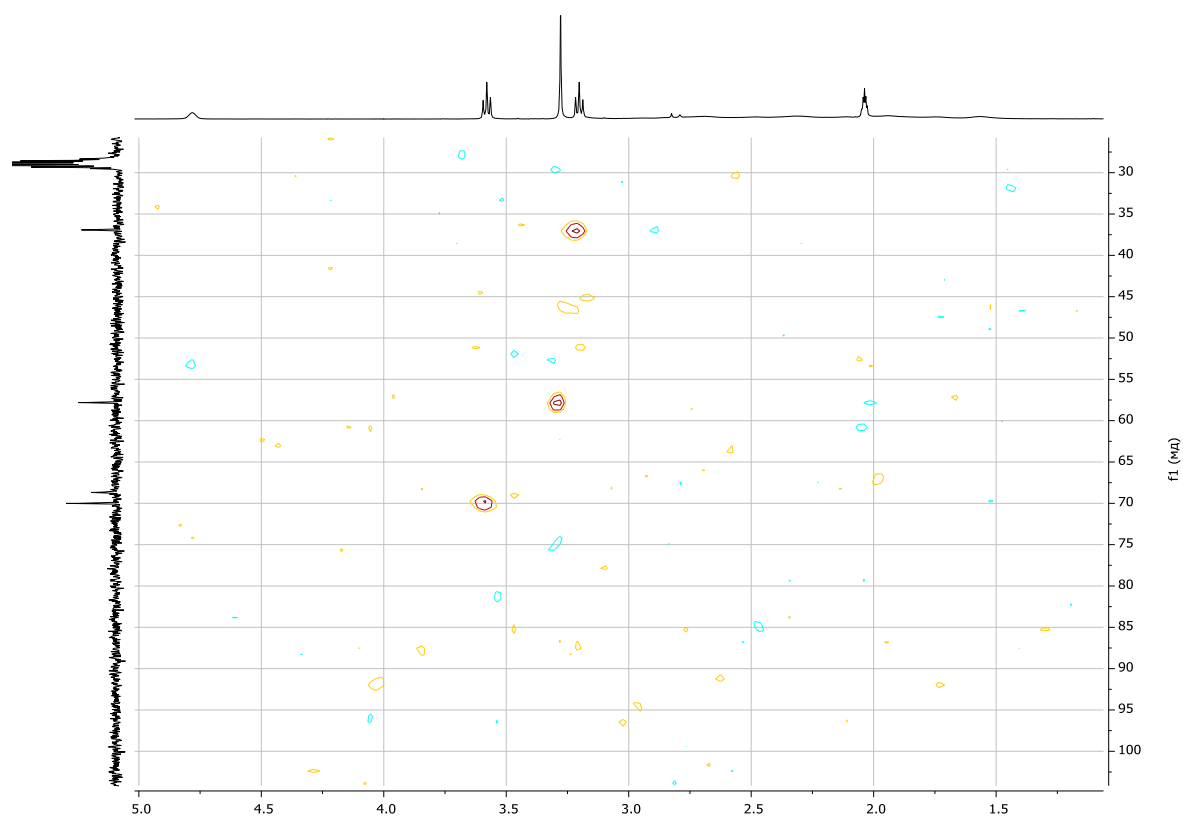

**Fig. S4.** (HC)HSQC NMR spectrum of compound **1** in acetone- $d_6$

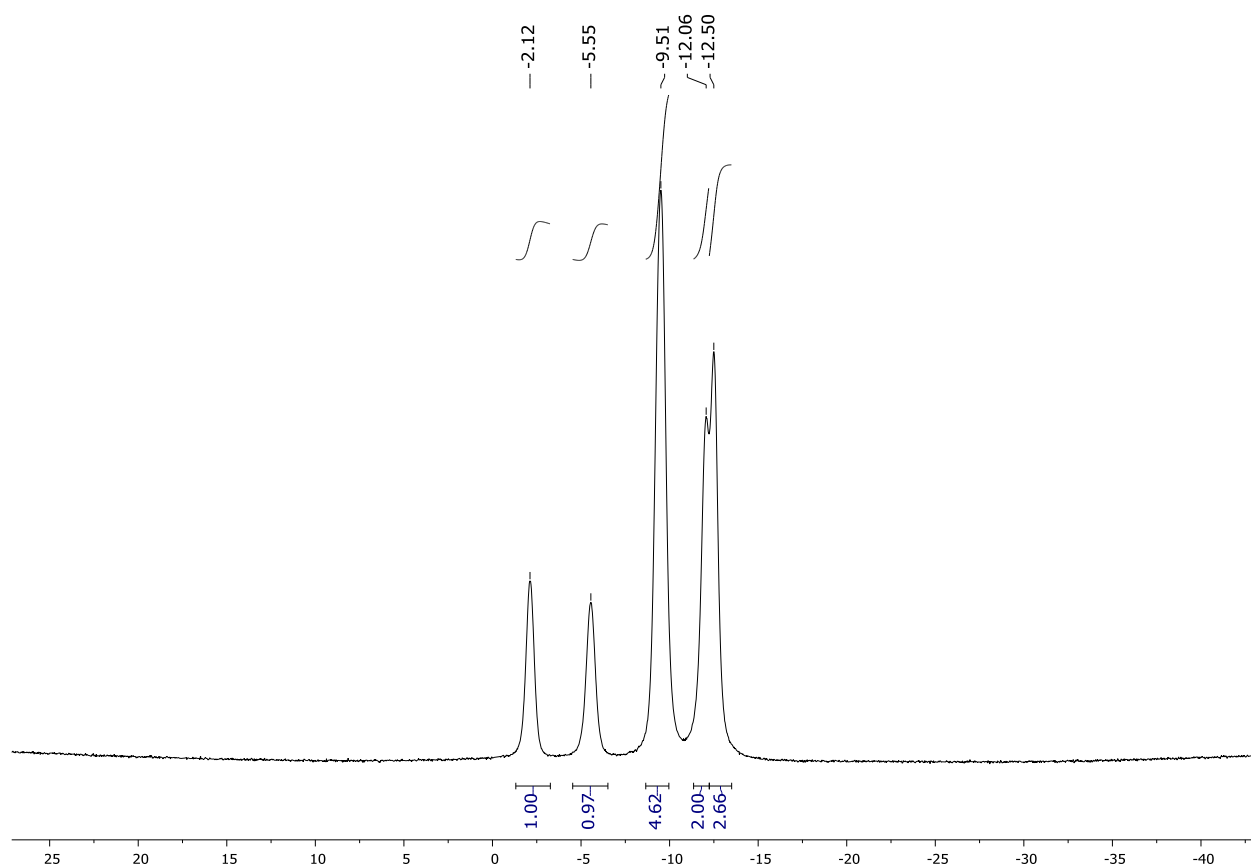

**Fig. S5.**  $^{11}\text{B}\{^1\text{H}\}$  NMR spectrum of compound **1** in acetone- $d_6$

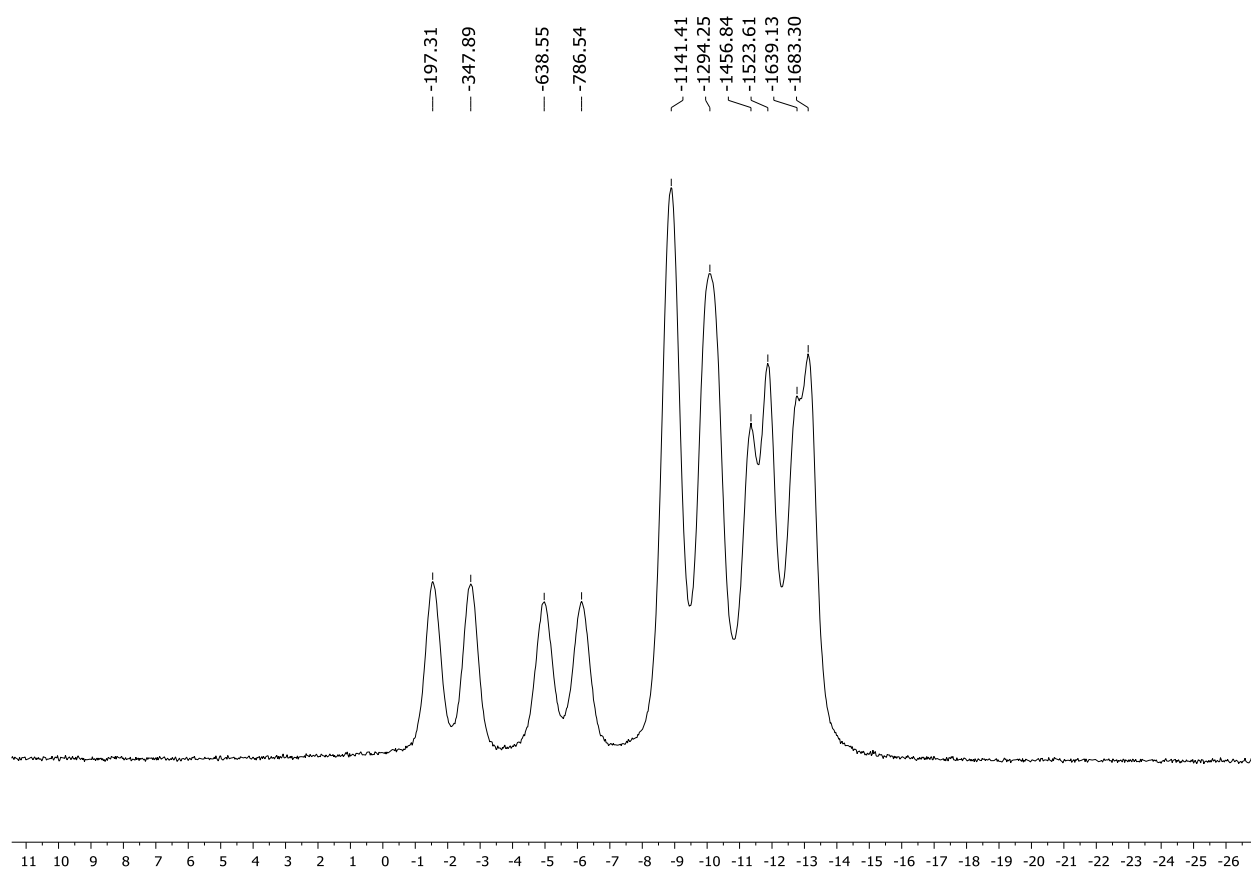

**Fig. S6.**  $^{11}\text{B}$  NMR spectrum of compound **1** in acetone- $\text{d}_6$



**Spectral data for 1-(MeO(CH<sub>2</sub>)<sub>3</sub>S)-1,2-C<sub>2</sub>B<sub>10</sub>H<sub>11</sub> (2)**

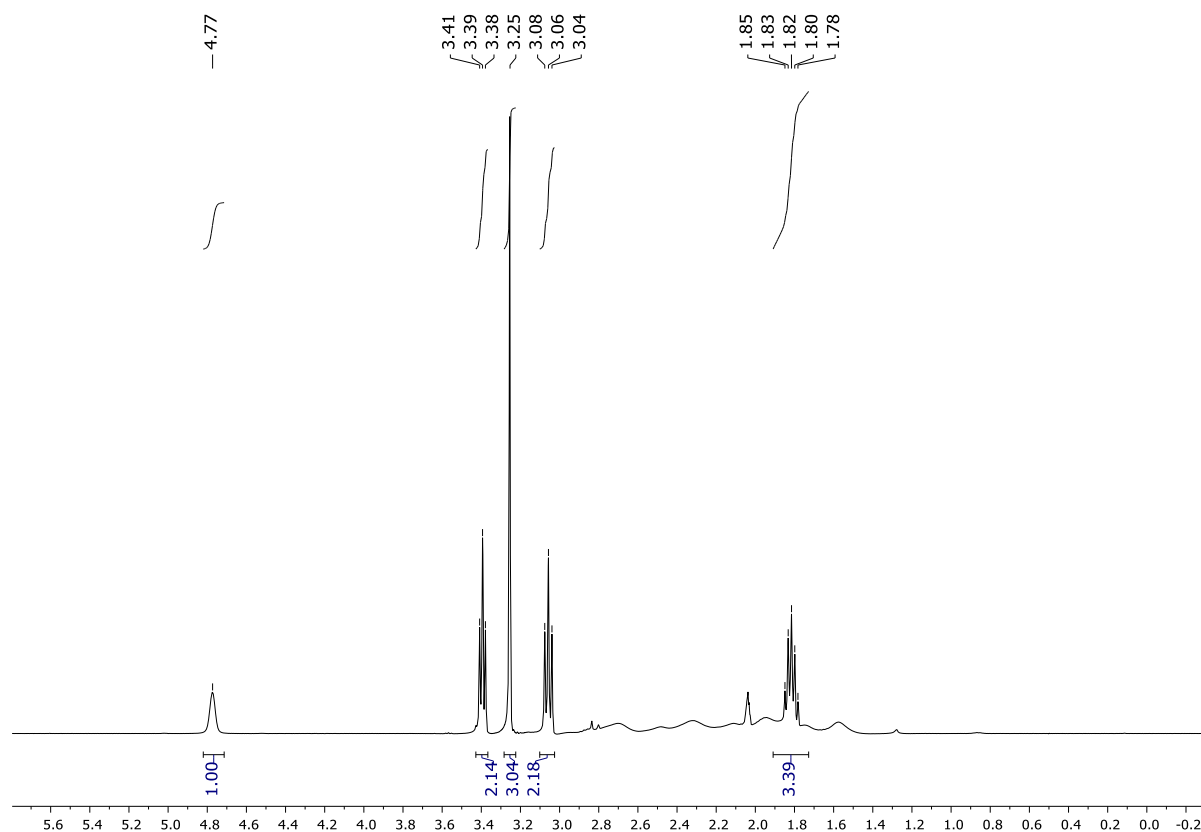

**Fig. S7.** <sup>1</sup>H NMR spectrum of compound **2** in acetone-d<sub>6</sub>

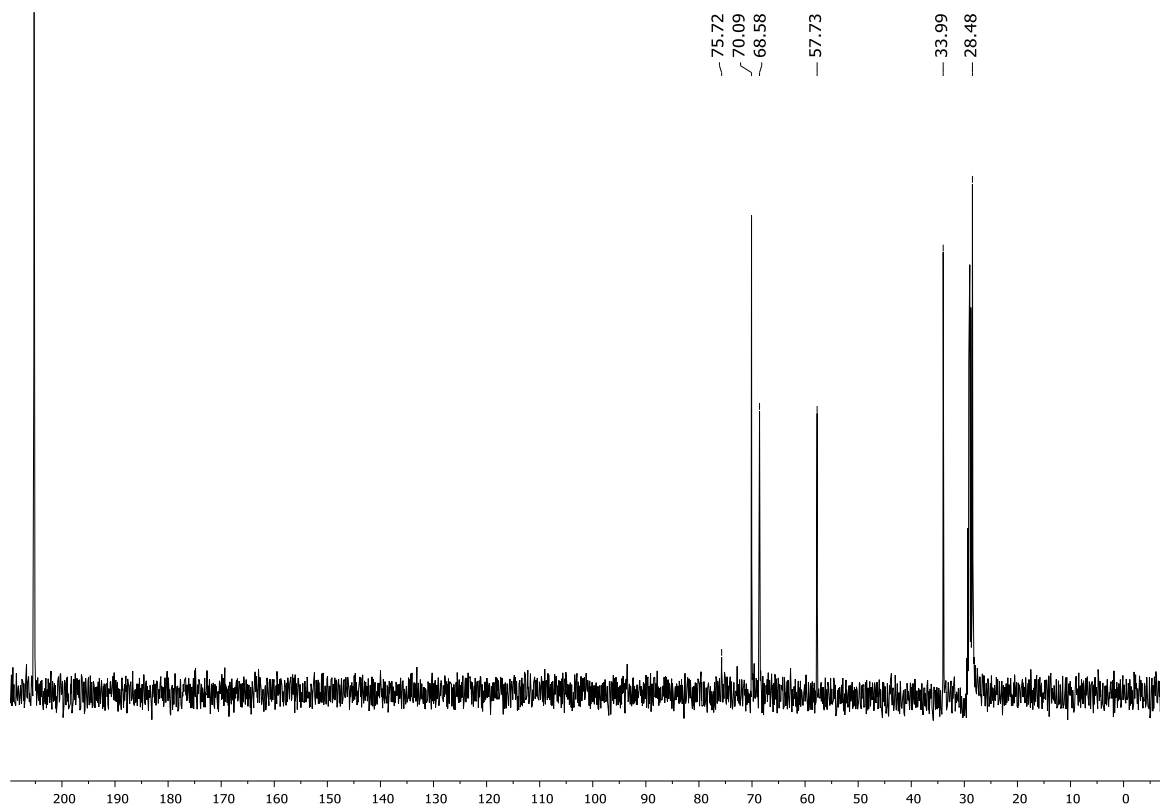

**Fig. S8.** <sup>13</sup>C NMR spectrum of compound **2** in acetone-d<sub>6</sub>

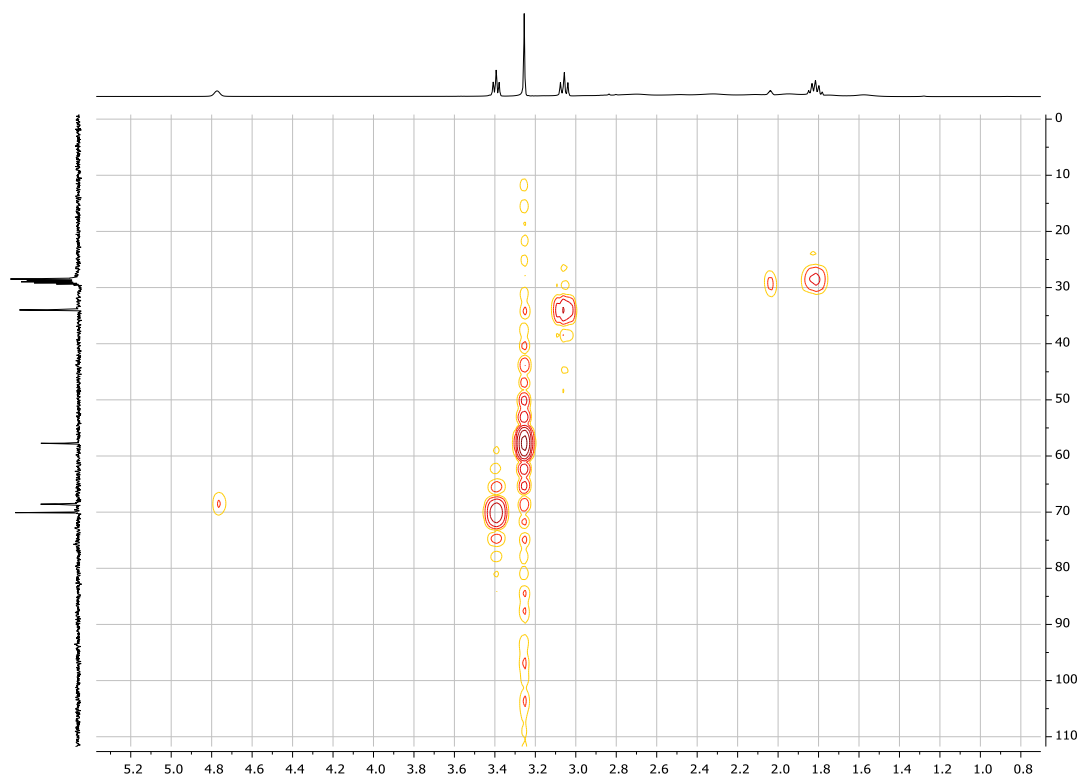

**Fig. S9.** (HC)HSQC NMR spectrum of compound **2** in acetone- $d_6$

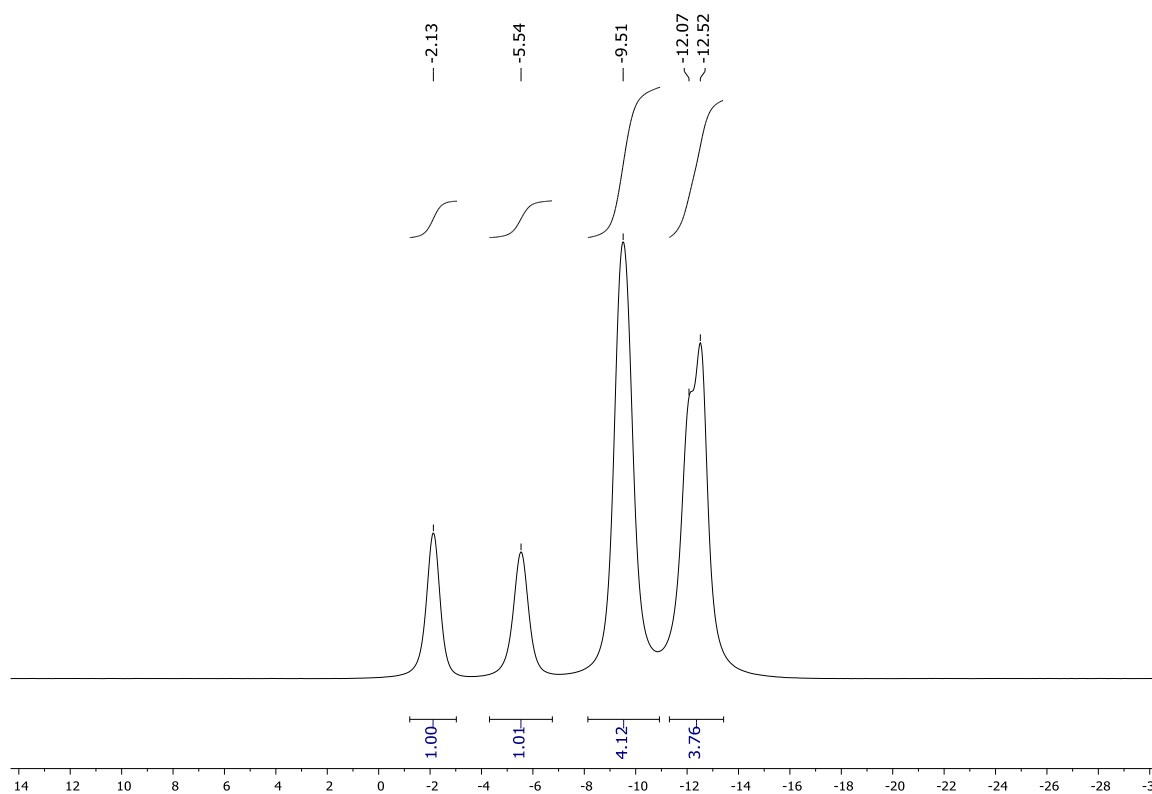

**Fig. S10.**  $^{11}\text{B}\{^1\text{H}\}$  NMR spectrum of compound **2** in acetone- $d_6$

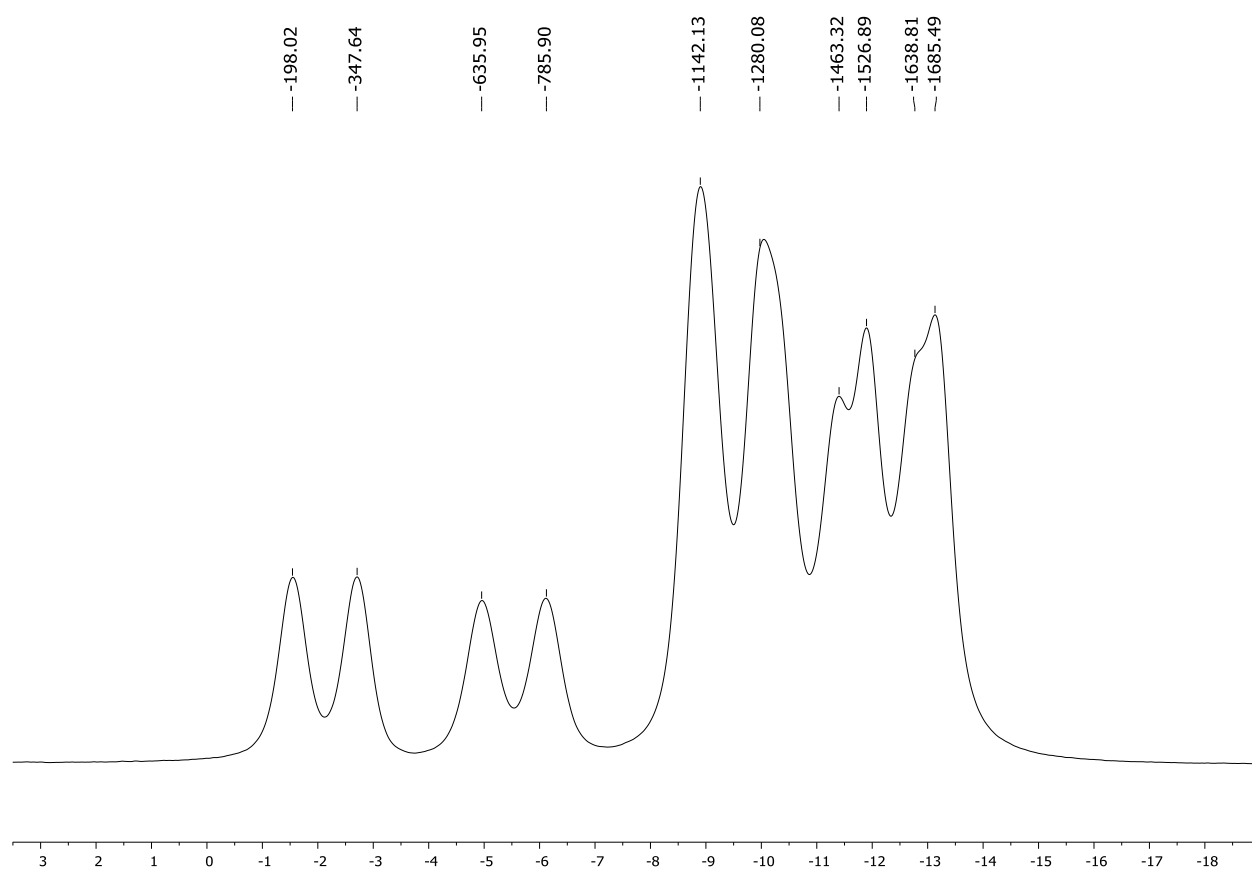

**Fig. S11.**  $^{11}\text{B}$  NMR spectrum of compound **2** in acetone- $\text{d}_6$

Spectral data for Cs[7-(MeO(CH<sub>2</sub>)<sub>2</sub>S)-7,8-C<sub>2</sub>B<sub>9</sub>H<sub>11</sub>] (3)

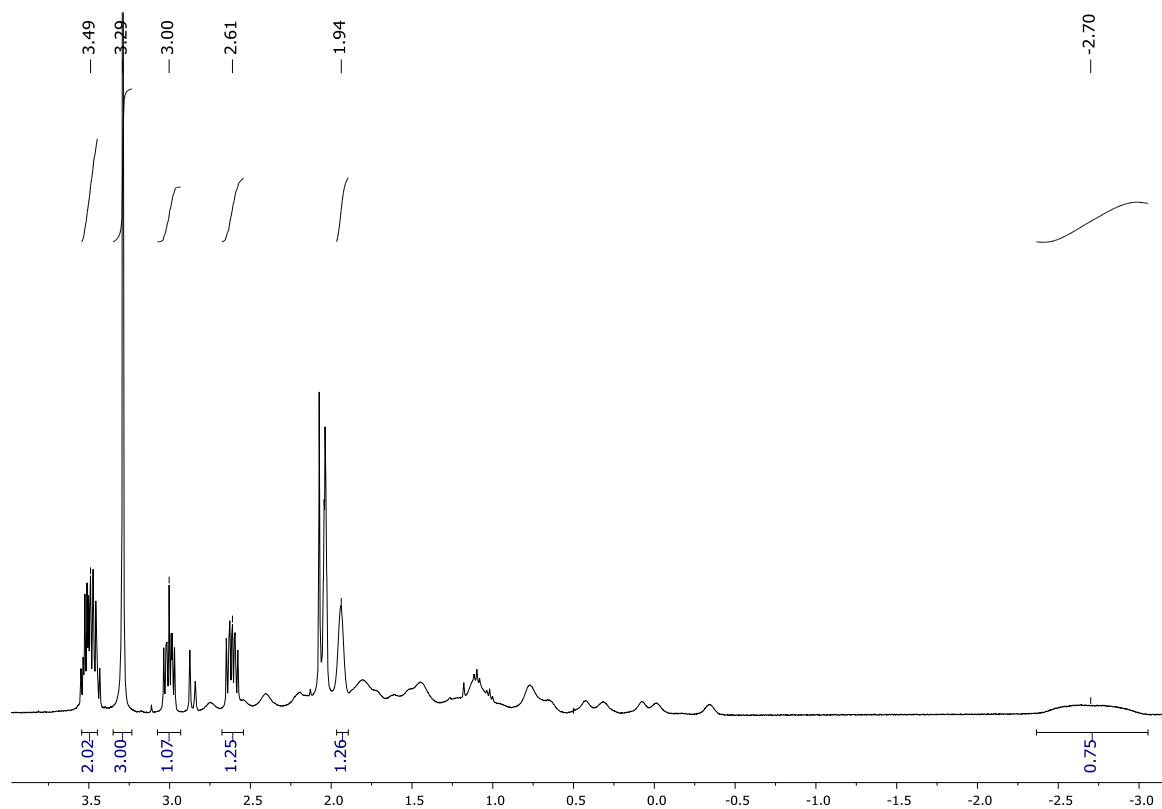

Fig. S12. <sup>1</sup>H NMR spectrum of compound **3** in acetone-d<sub>6</sub>

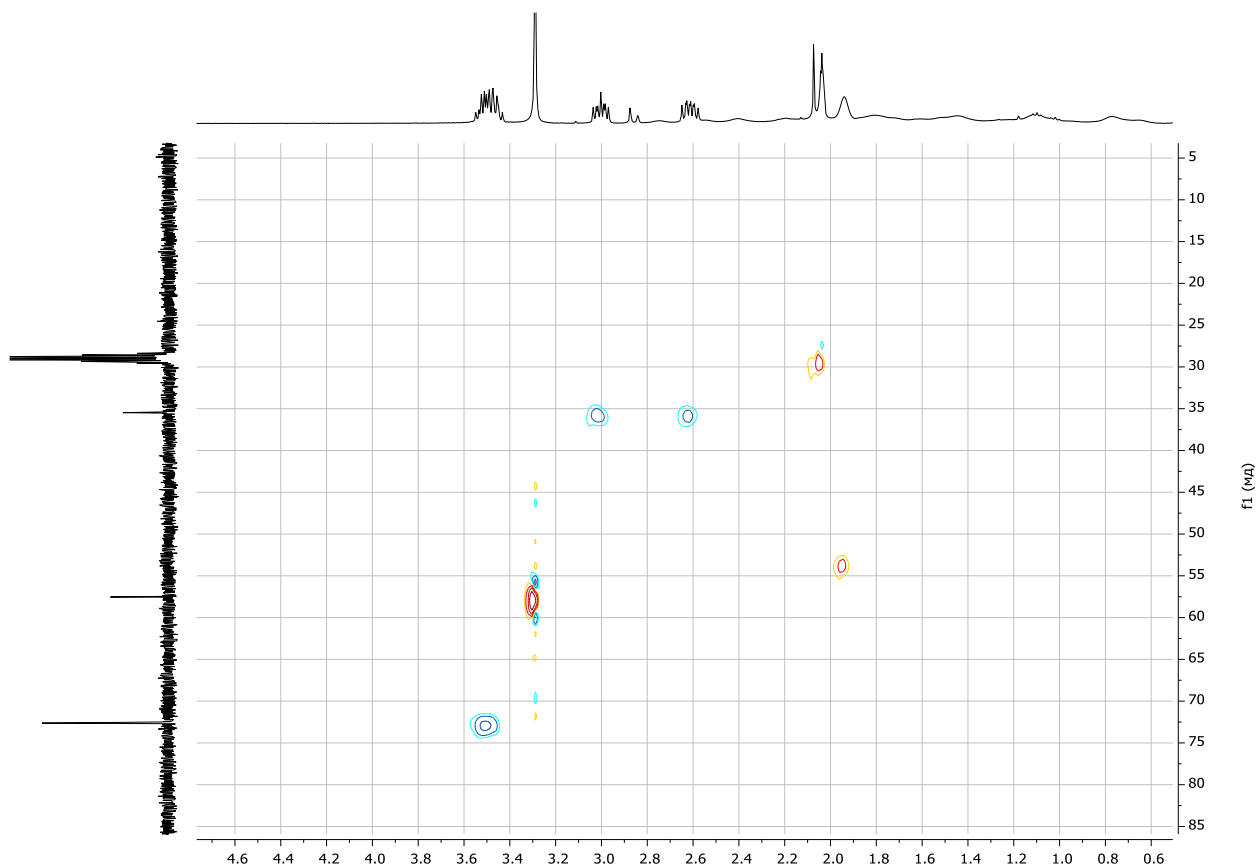

Fig. S13. (H)C HSQC NMR spectrum of compound **3** in acetone-d<sub>6</sub>

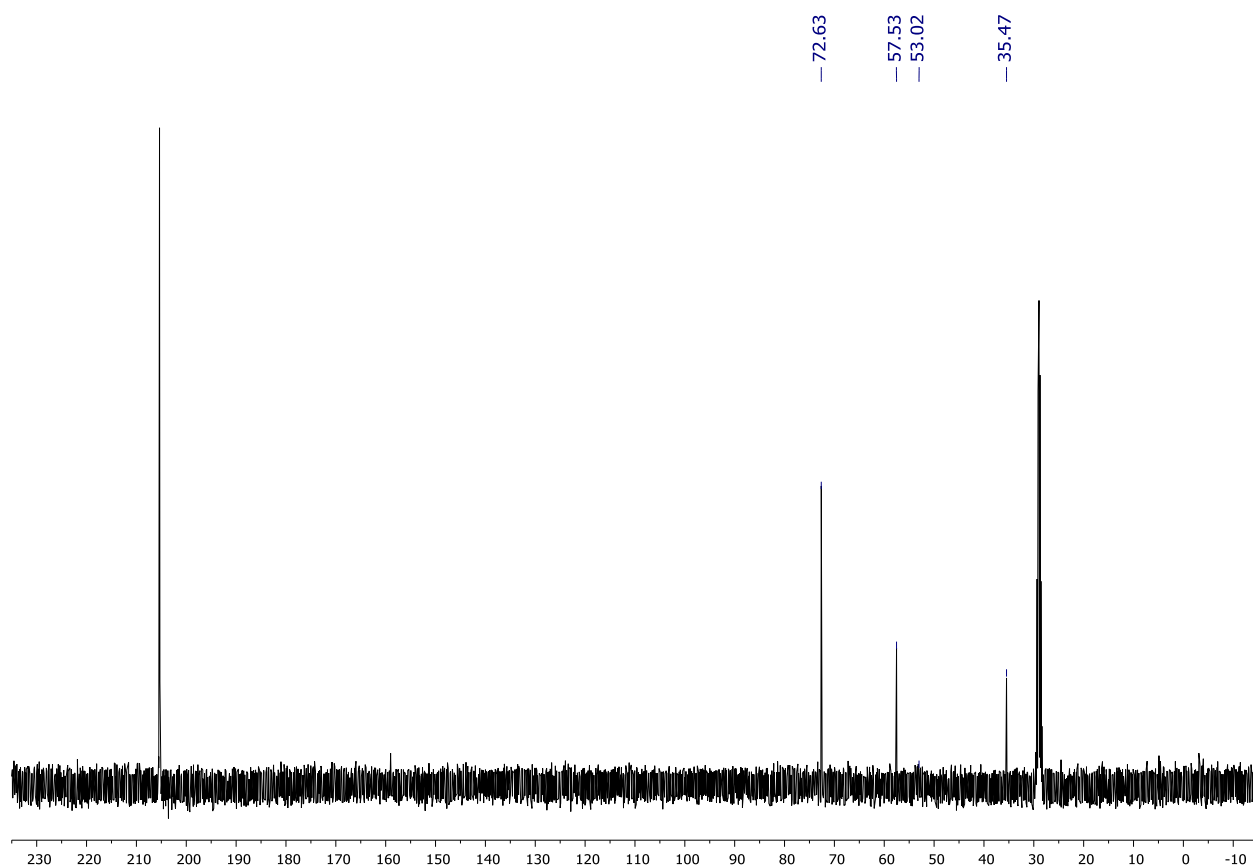

**Fig. S14.**  $^{13}\text{C}$  NMR spectrum of compound **3** in acetone- $\text{d}_6$

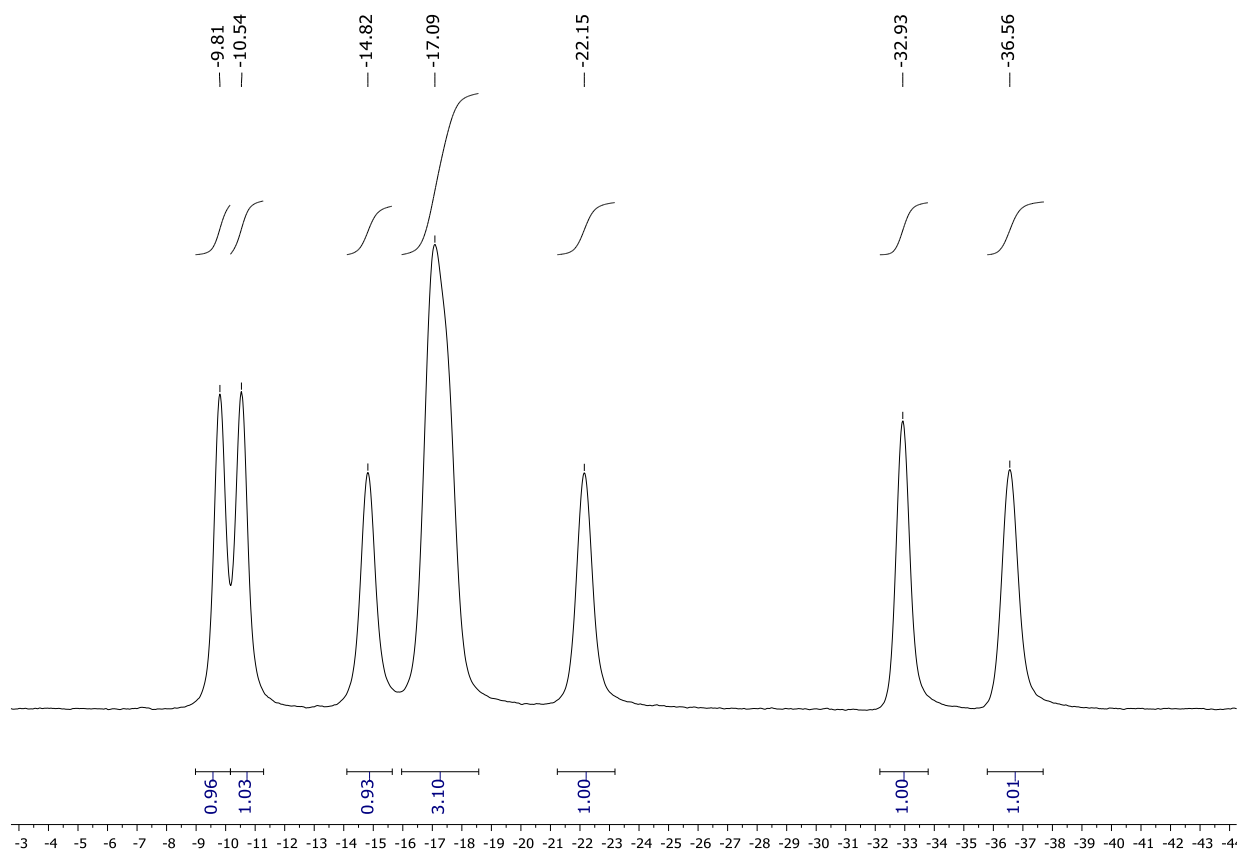

**Fig. S15.**  $^{11}\text{B}\{^1\text{H}\}$  NMR spectrum of compound **3** in acetone- $\text{d}_6$

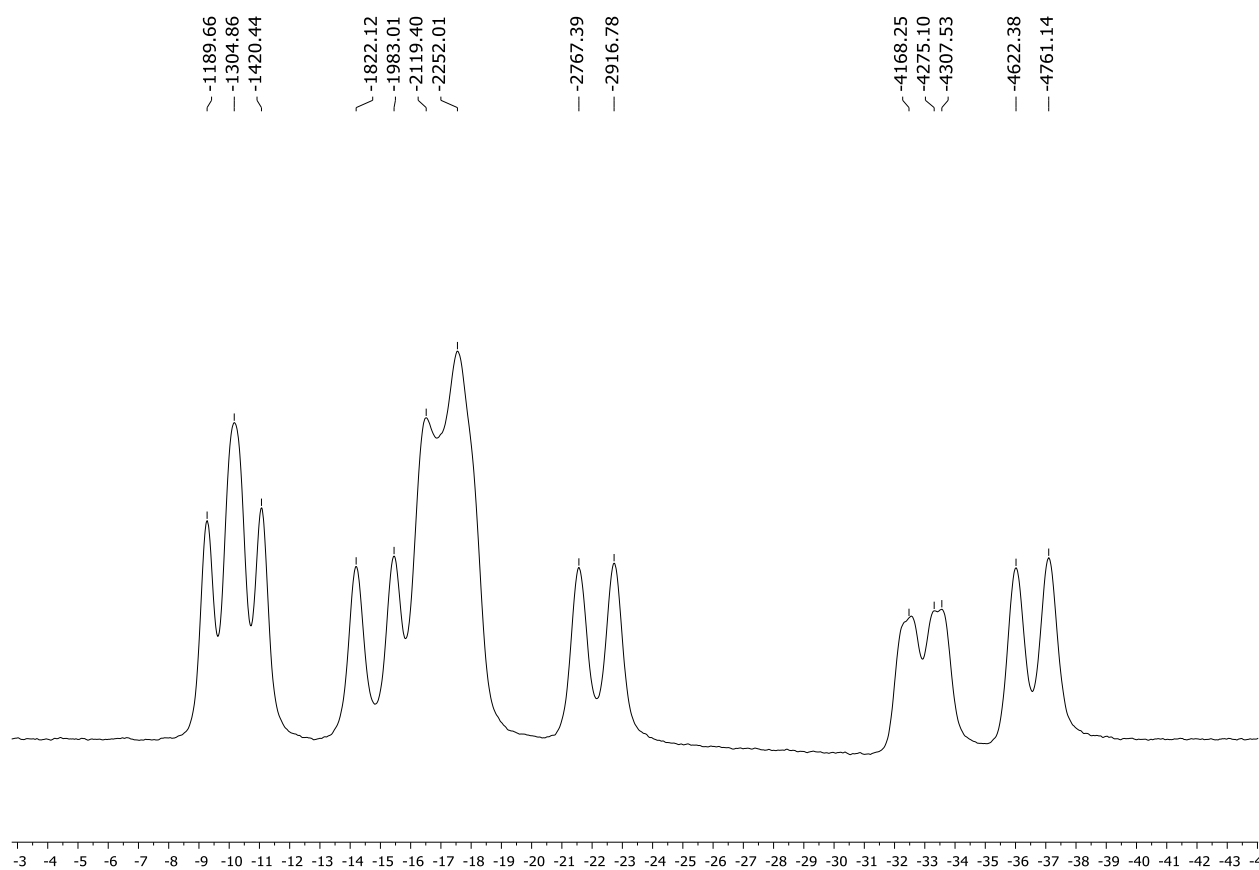

**Fig. S16.**  $^{11}\text{B}\{^1\text{H}\}$  NMR spectrum of compound **3** in acetone- $\text{d}_6$

Spectral data for Cs[7-(MeO(CH<sub>2</sub>)<sub>3</sub>S)-7,8-C<sub>2</sub>B<sub>9</sub>H<sub>11</sub>] (**4**)

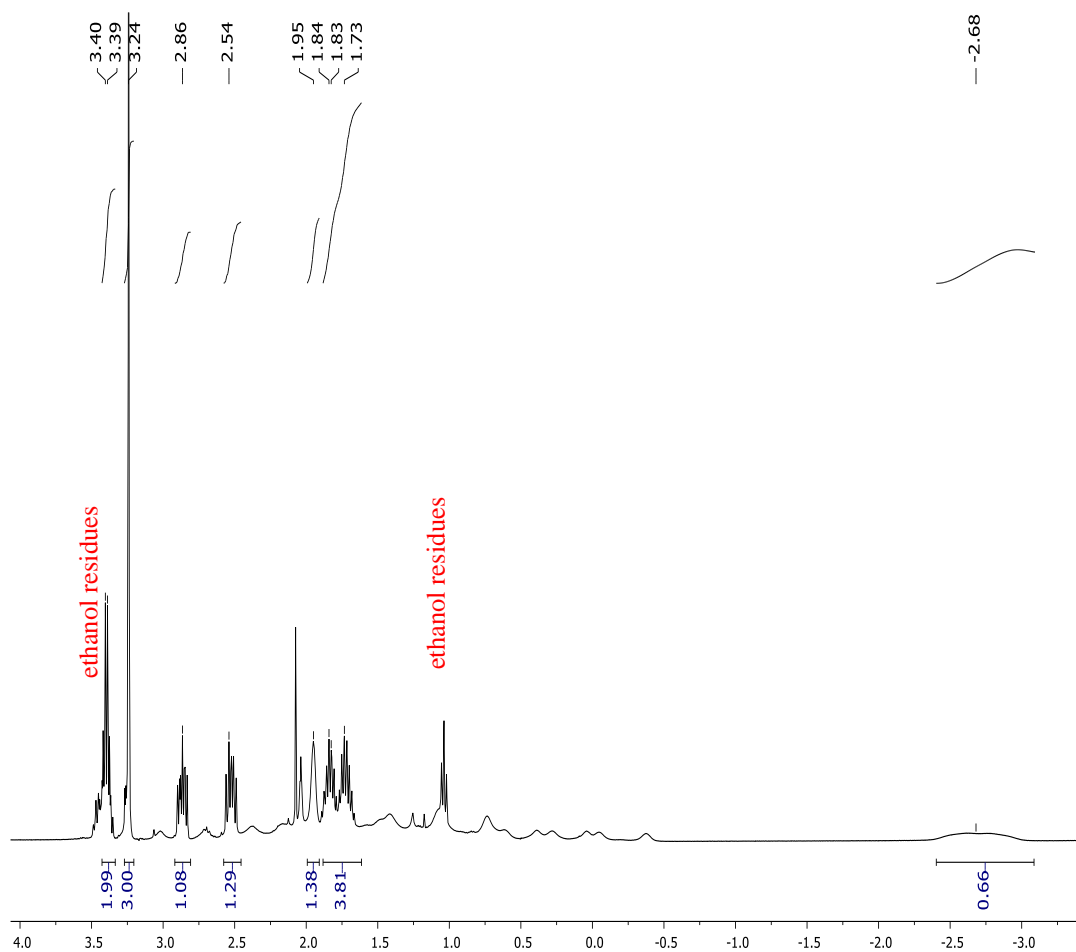

Fig. S17. <sup>1</sup>H NMR spectrum of compound **4** in acetone-d<sub>6</sub>

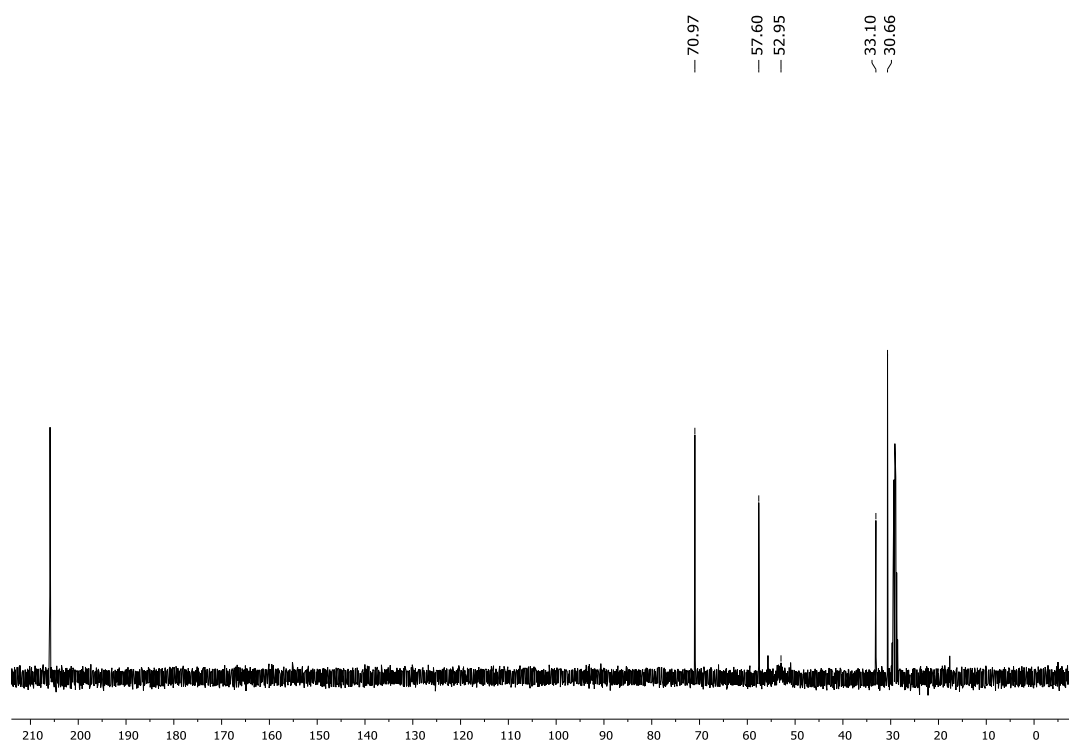

Fig. S18. <sup>13</sup>C NMR spectrum of compound **4** in acetone-d<sub>6</sub>

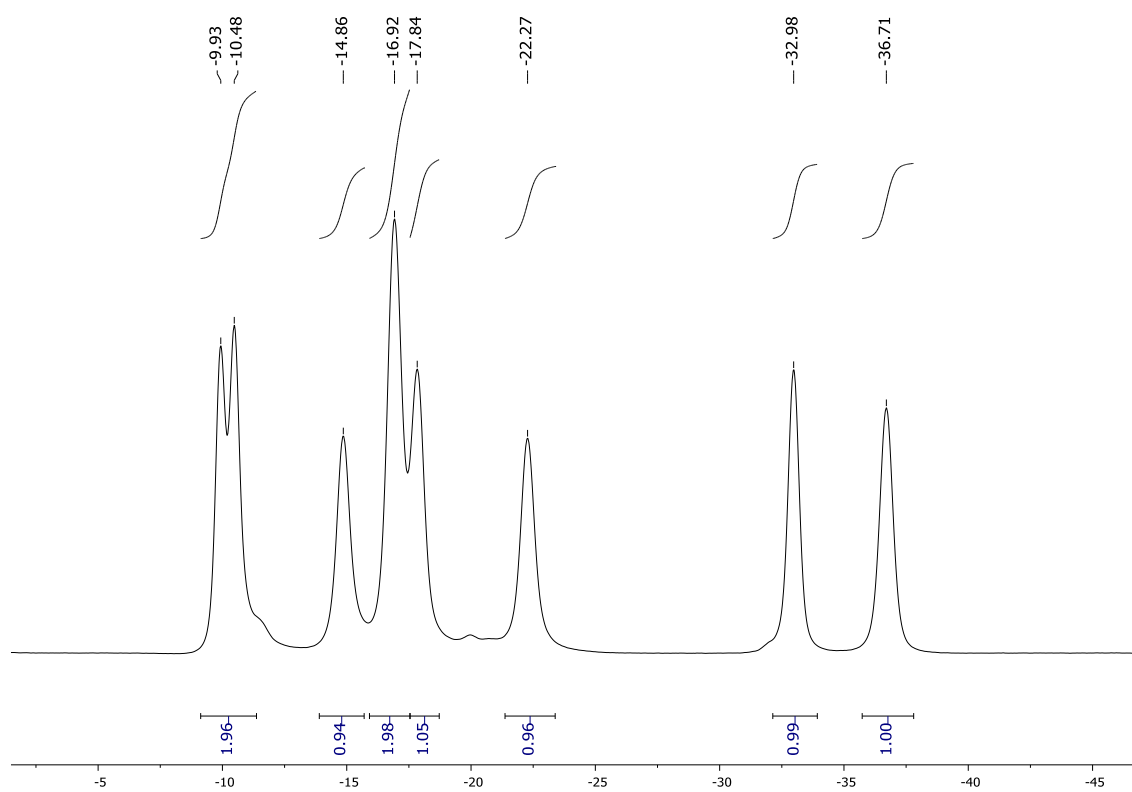

**Fig. S19.**  $^{11}\text{B}\{^1\text{H}\}$  NMR spectrum of compound **4** in acetone- $\text{d}_6$

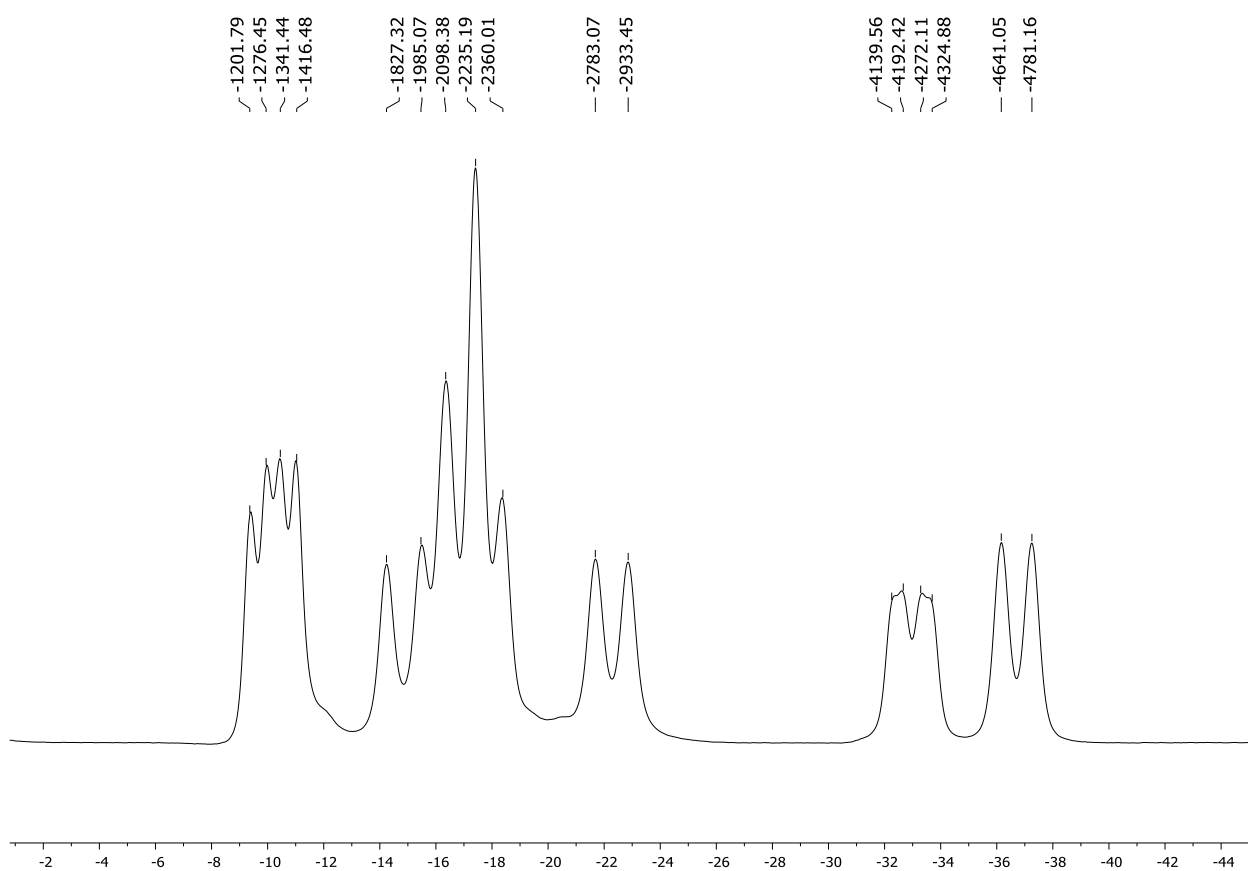

**Fig. S20.**  $^{11}\text{B}\{^1\text{H}\}$  NMR spectrum of compound **4** in acetone- $\text{d}_6$



**Spectral data for 3,3-(dppe)-1-(MeO(CH<sub>2</sub>)<sub>2</sub>S)-closo-3,1,2-NiC<sub>2</sub>B<sub>9</sub>H<sub>10</sub> (**5**)**

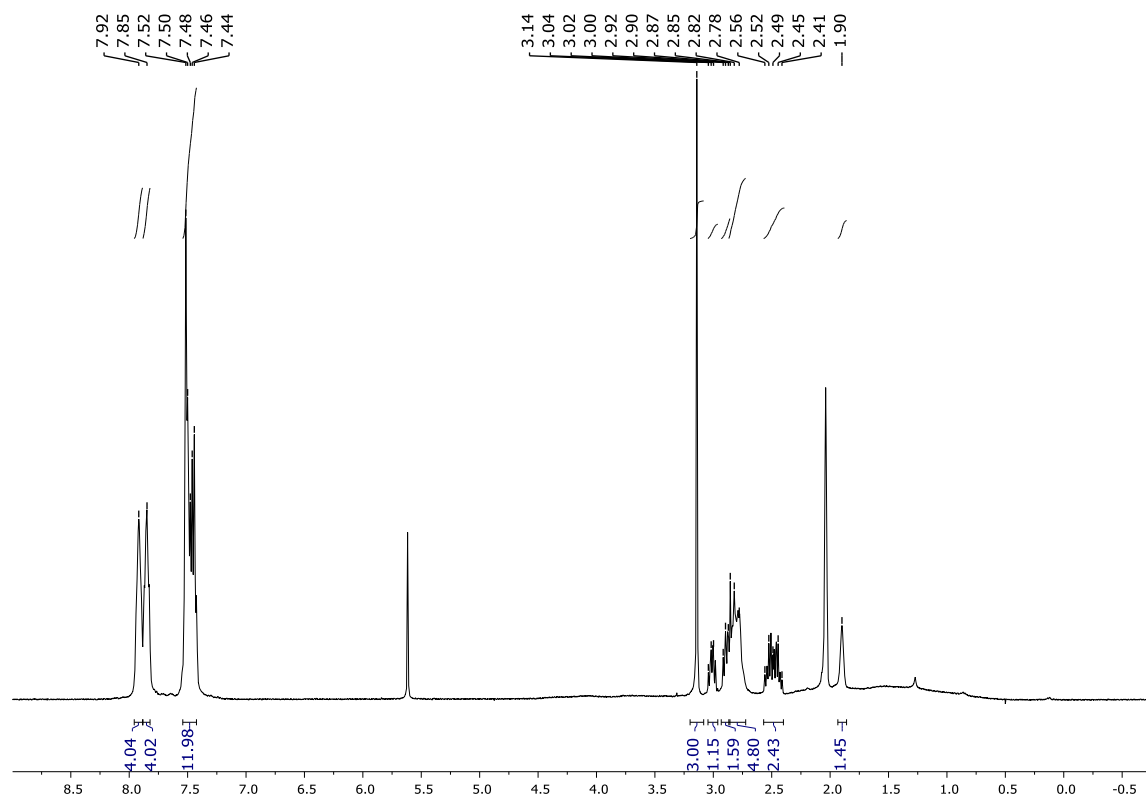

**Fig. S21.** <sup>1</sup>H NMR spectrum of compound **5** in acetone-d<sub>6</sub>

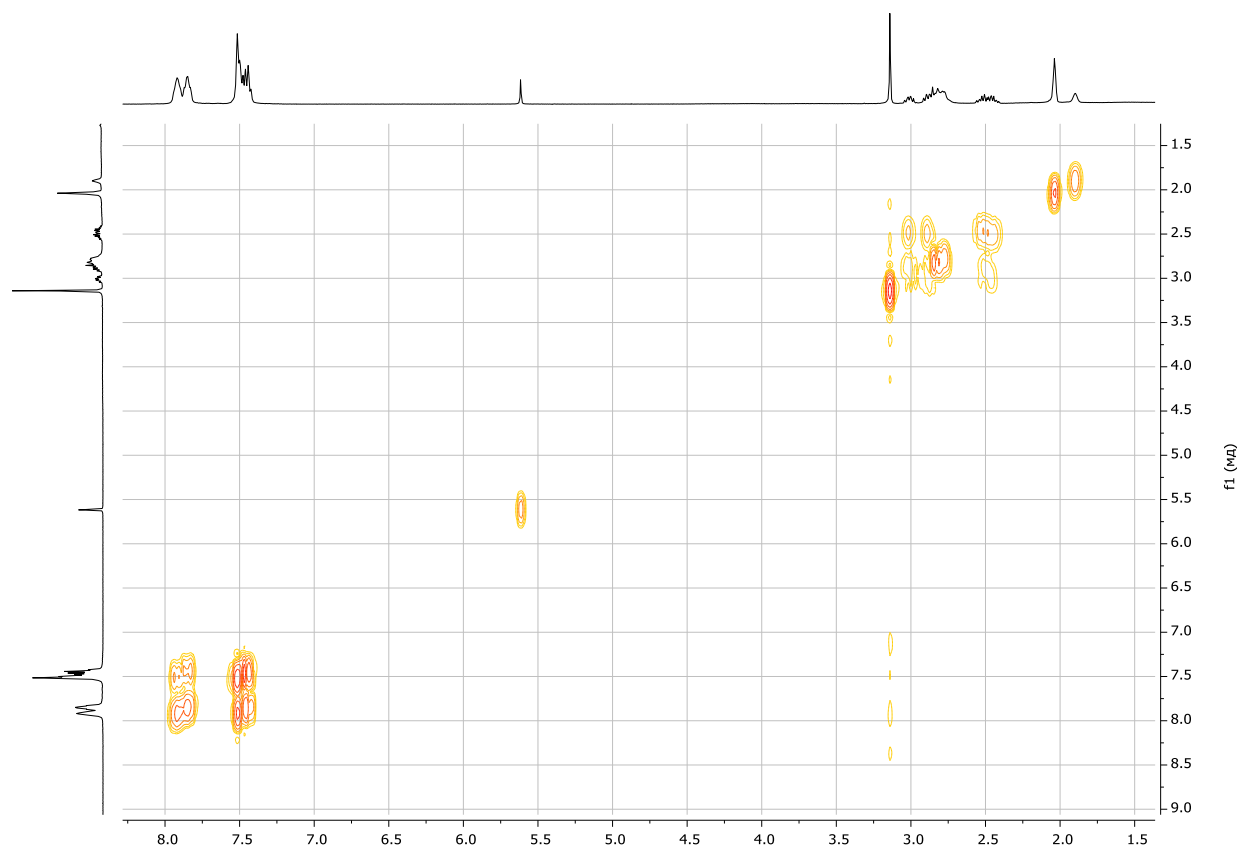

**Fig. S22.** (H)COSY NMR spectrum of compound **5** in acetone-d<sub>6</sub>

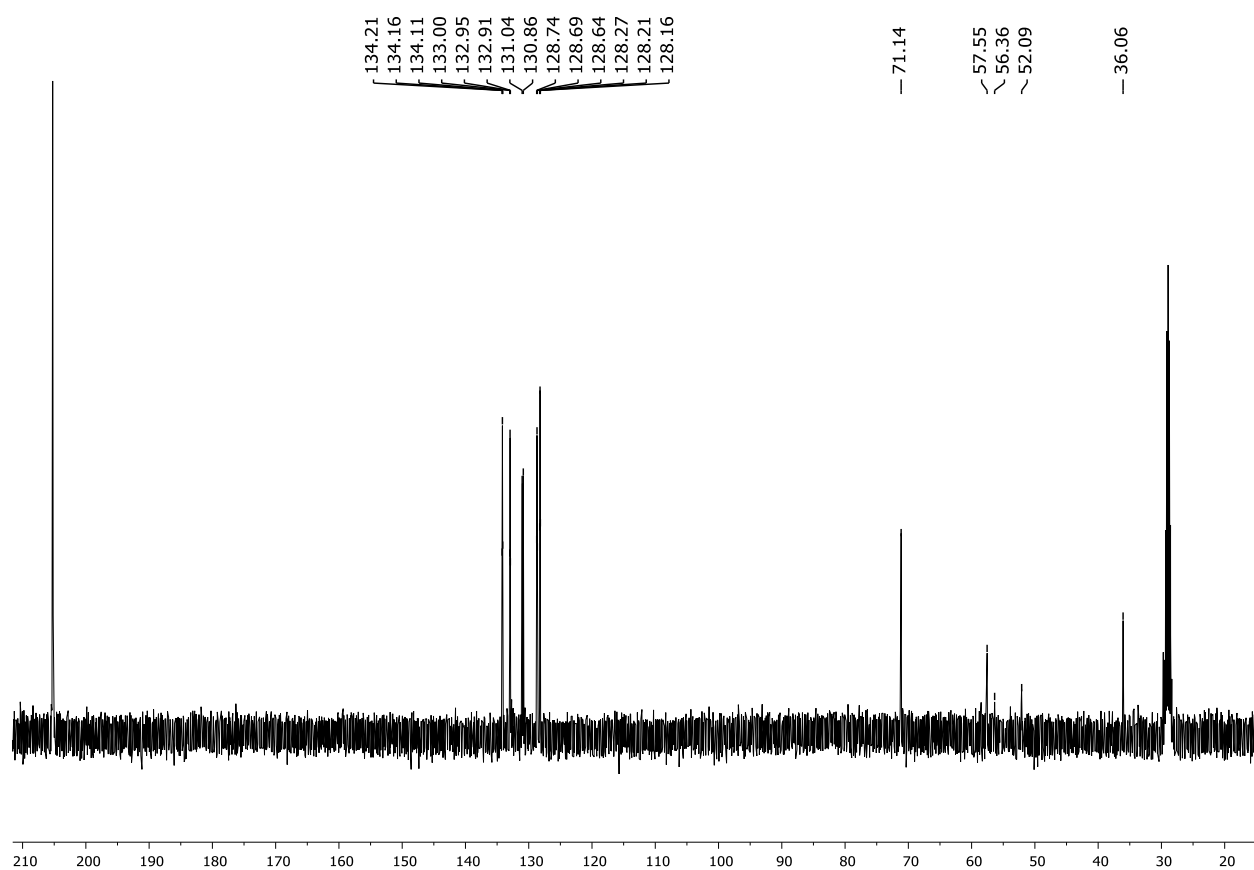

**Fig. S23.**  $^{13}\text{C}$  NMR spectrum of compound **5** in acetone- $\text{d}_6$

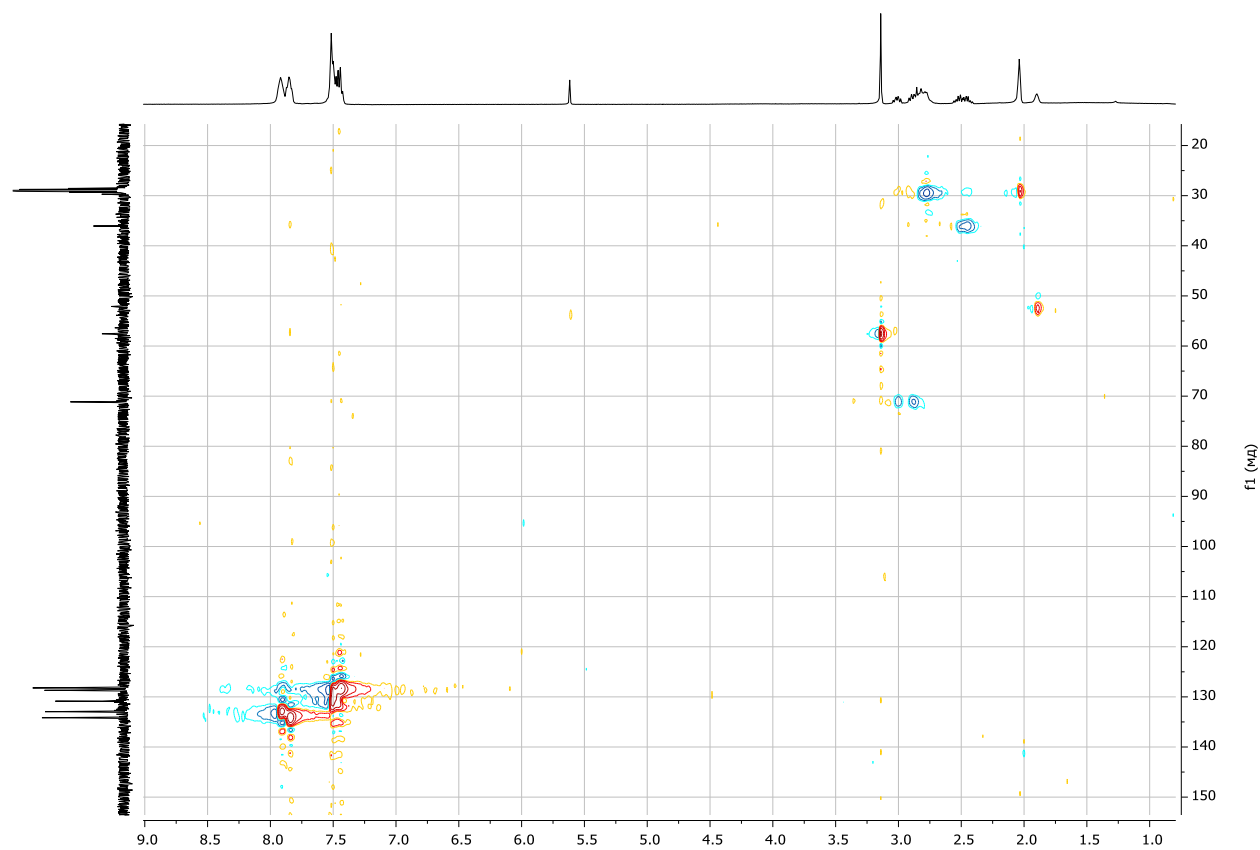

**Fig. S24.** (H)C HSQC NMR spectrum of compound **5** in acetone- $\text{d}_6$

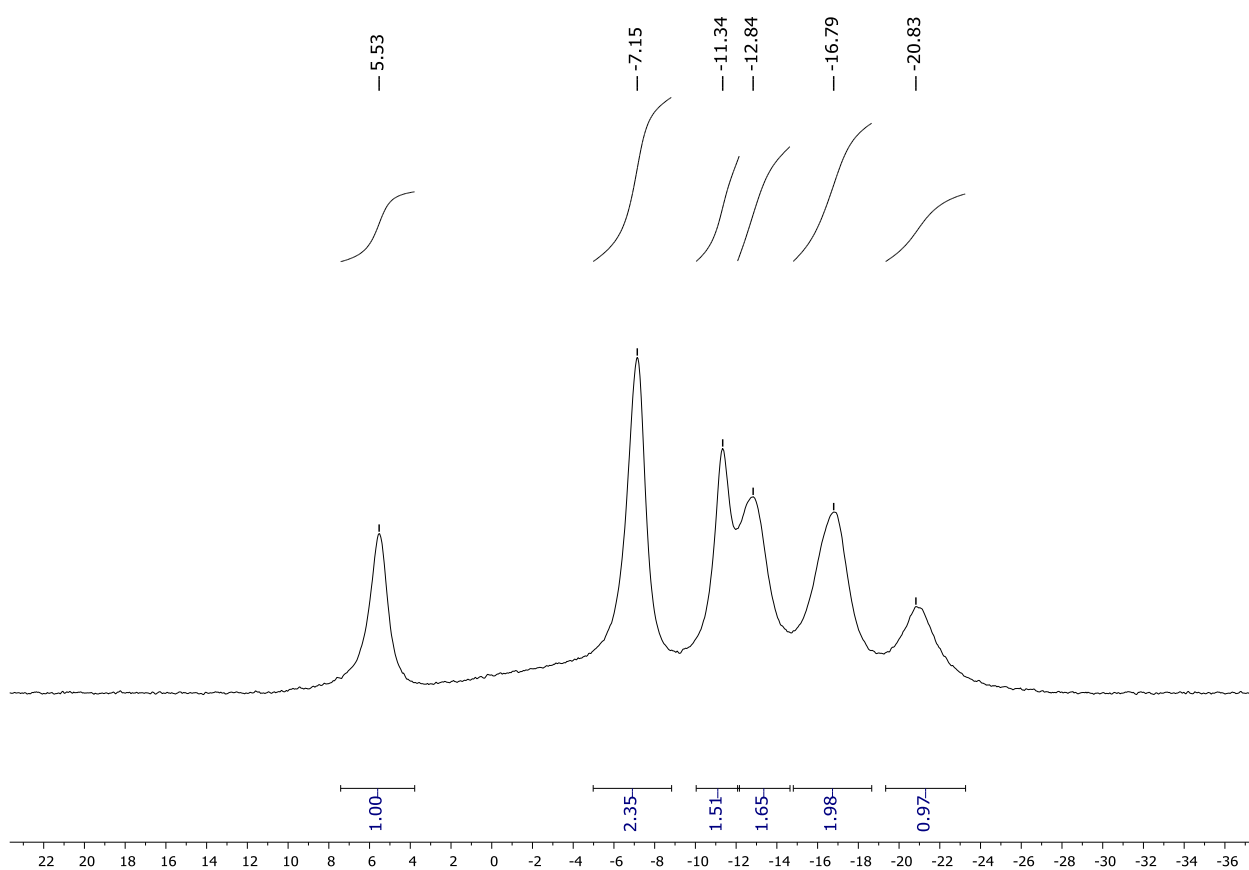

**Fig. S25.**  $^{11}\text{B}\{^1\text{H}\}$  NMR spectrum of compound **5** in acetone- $\text{d}_6$

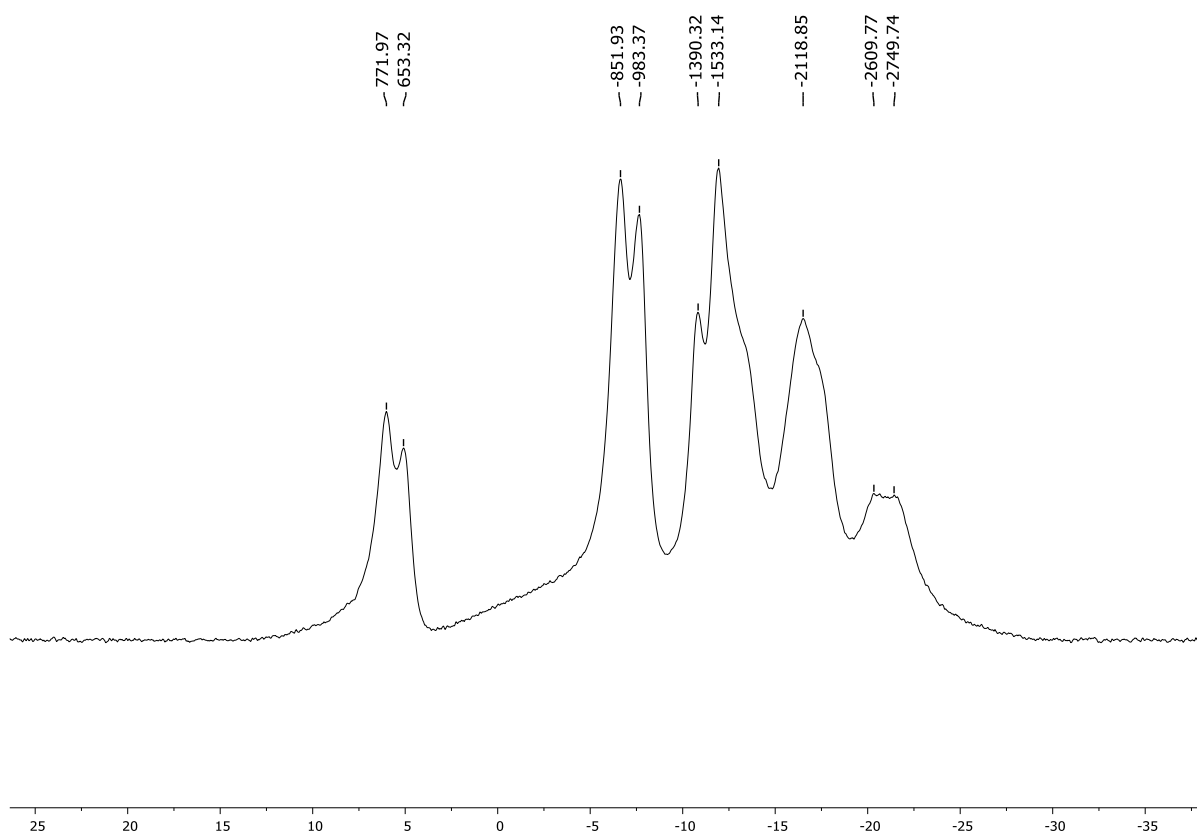

**Fig. S26.**  $^{11}\text{B}$  NMR spectrum of compound **5** in acetone- $\text{d}_6$

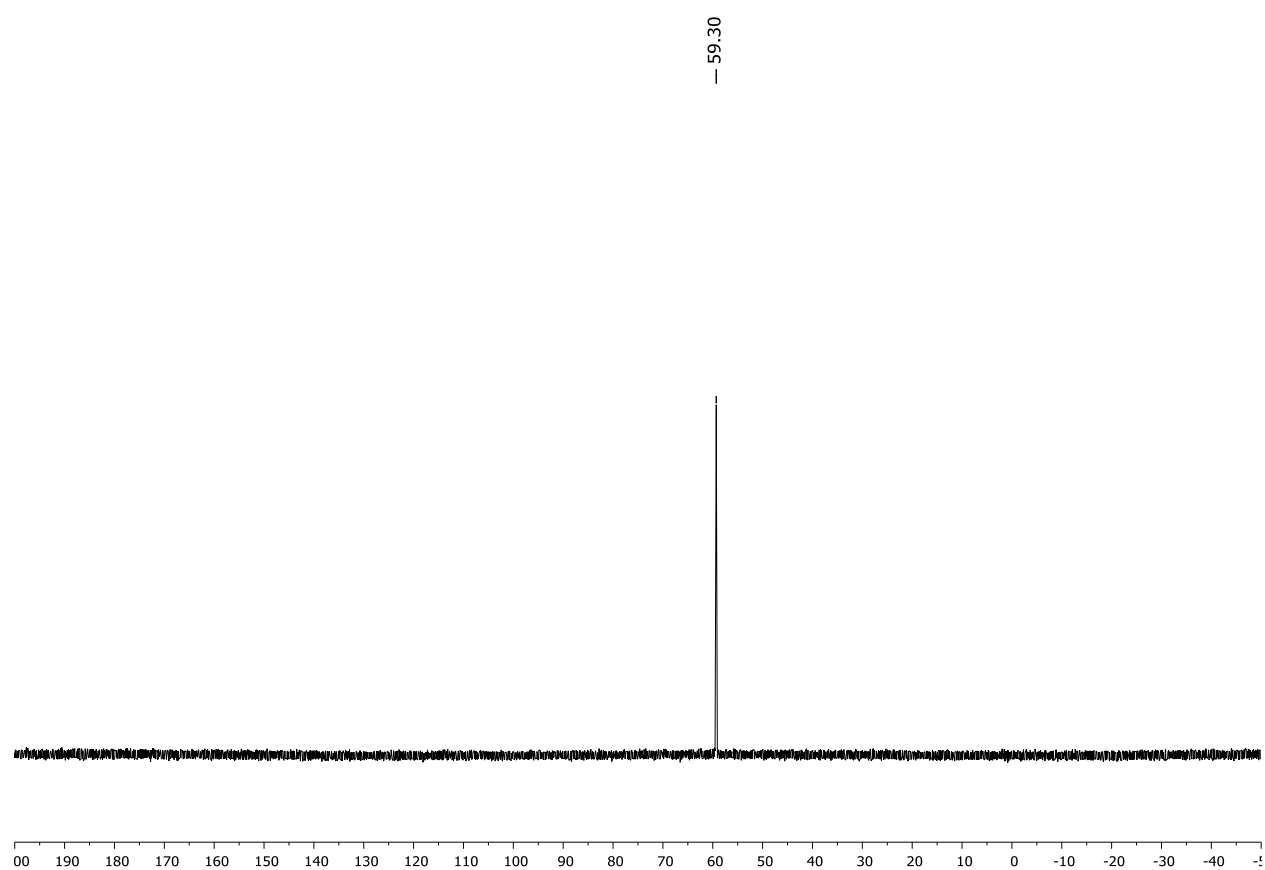

**Fig. S27.**  $^{31}\text{P}\{^1\text{H}\}$  NMR spectrum of compound **5** in acetone- $\text{d}_6$

**Spectral data for 3,3-(Me<sub>2</sub>PhP)<sub>2</sub>-1-(MeO(CH<sub>2</sub>)<sub>2</sub>S)-*clos*o-3,1,2-NiC<sub>2</sub>B<sub>9</sub>H<sub>10</sub> (**6**)**

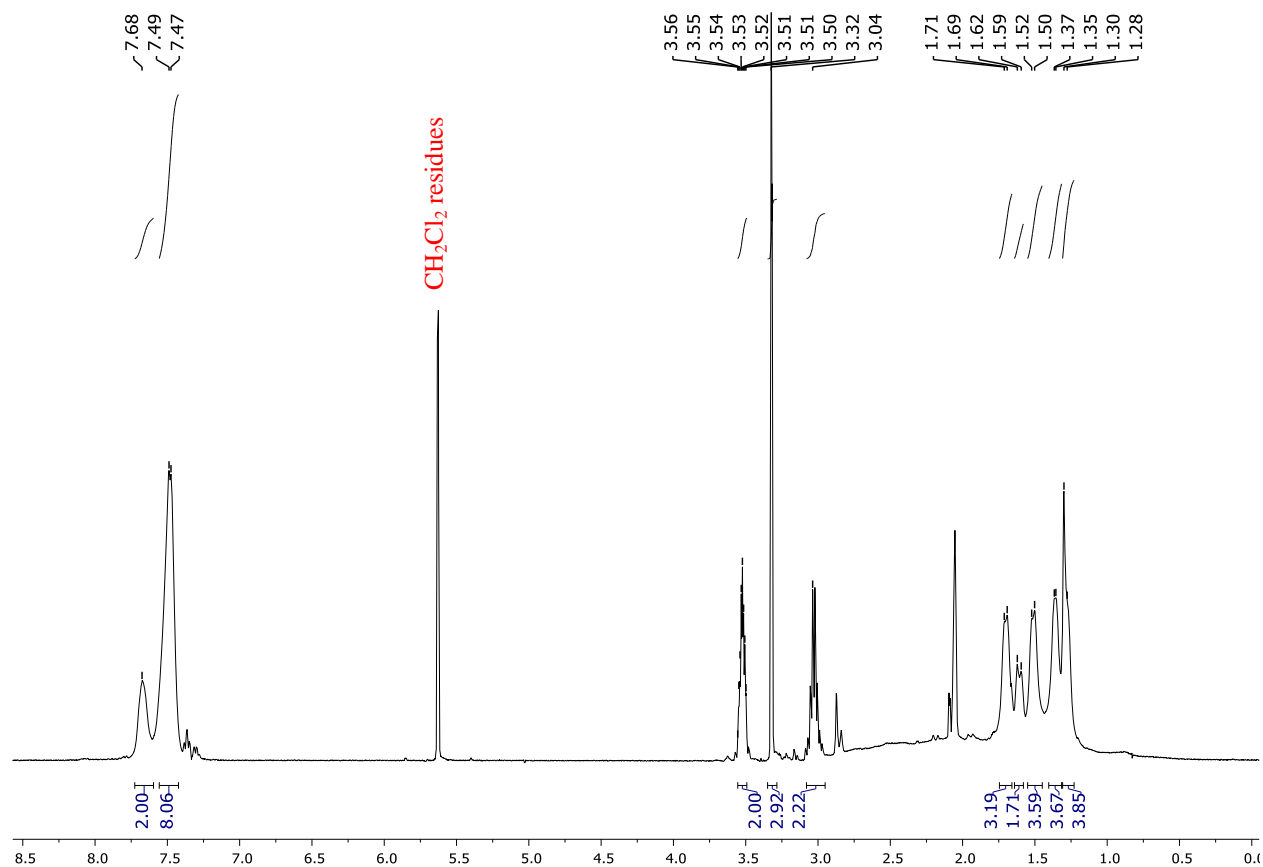

**Fig. S28.** <sup>1</sup>H NMR spectrum of compound **6** in acetone-d<sub>6</sub>

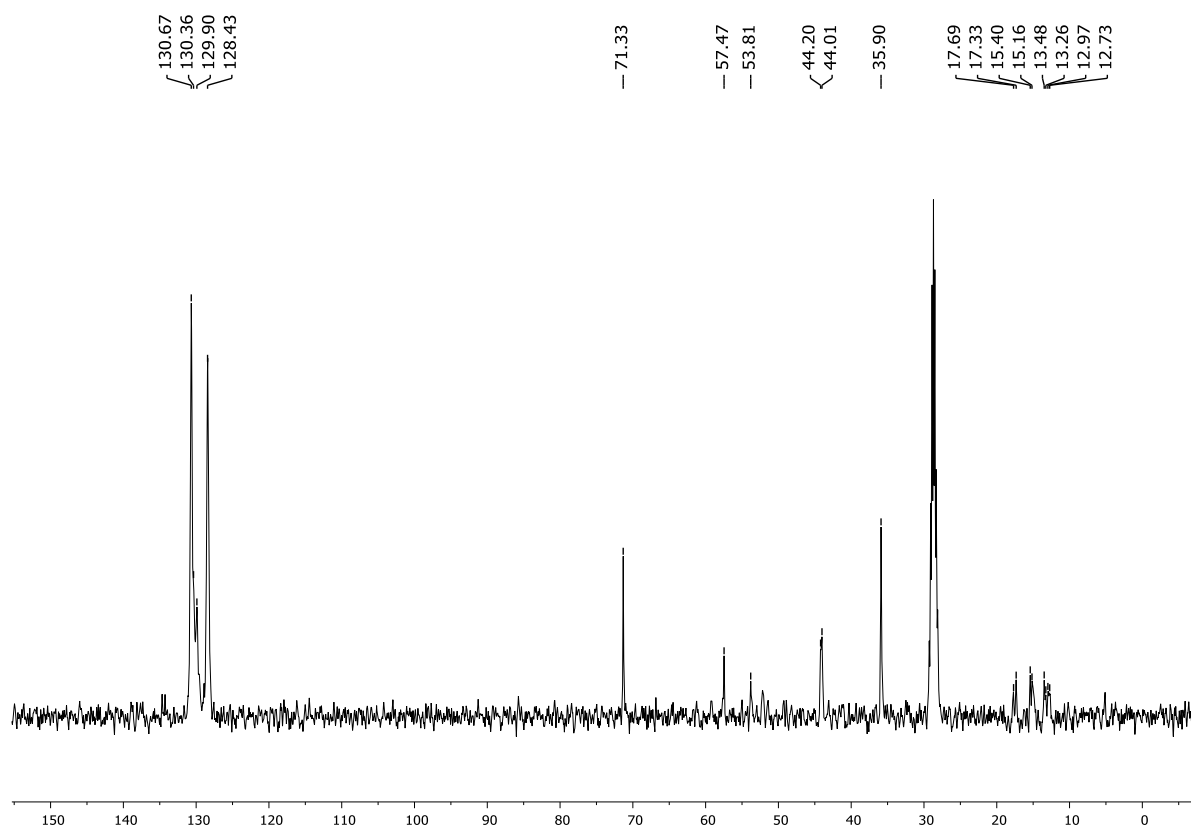

**Fig. S29.** <sup>13</sup>C NMR spectrum of compound **6** in acetone-d<sub>6</sub>

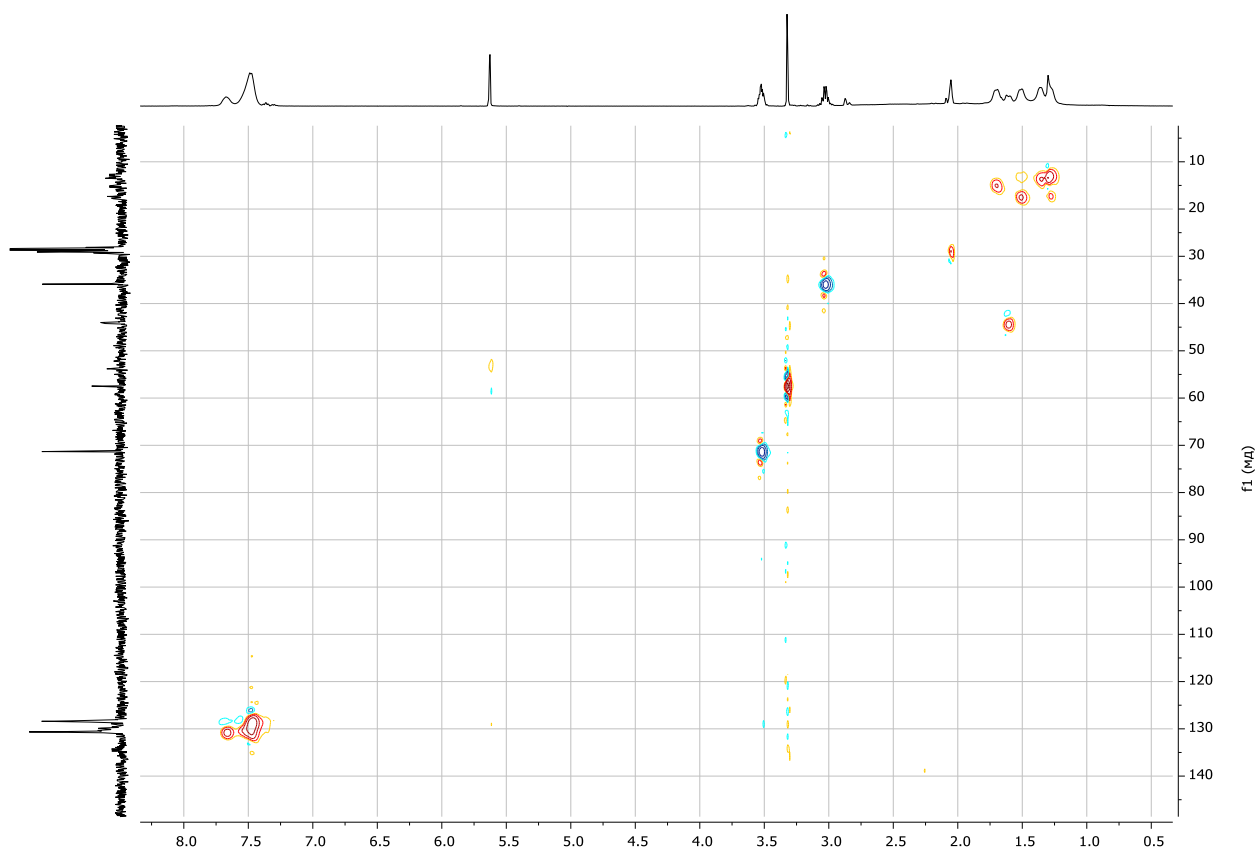

**Fig. S30.** (HC) HSQC NMR spectrum of compound **6** in acetone- $d_6$

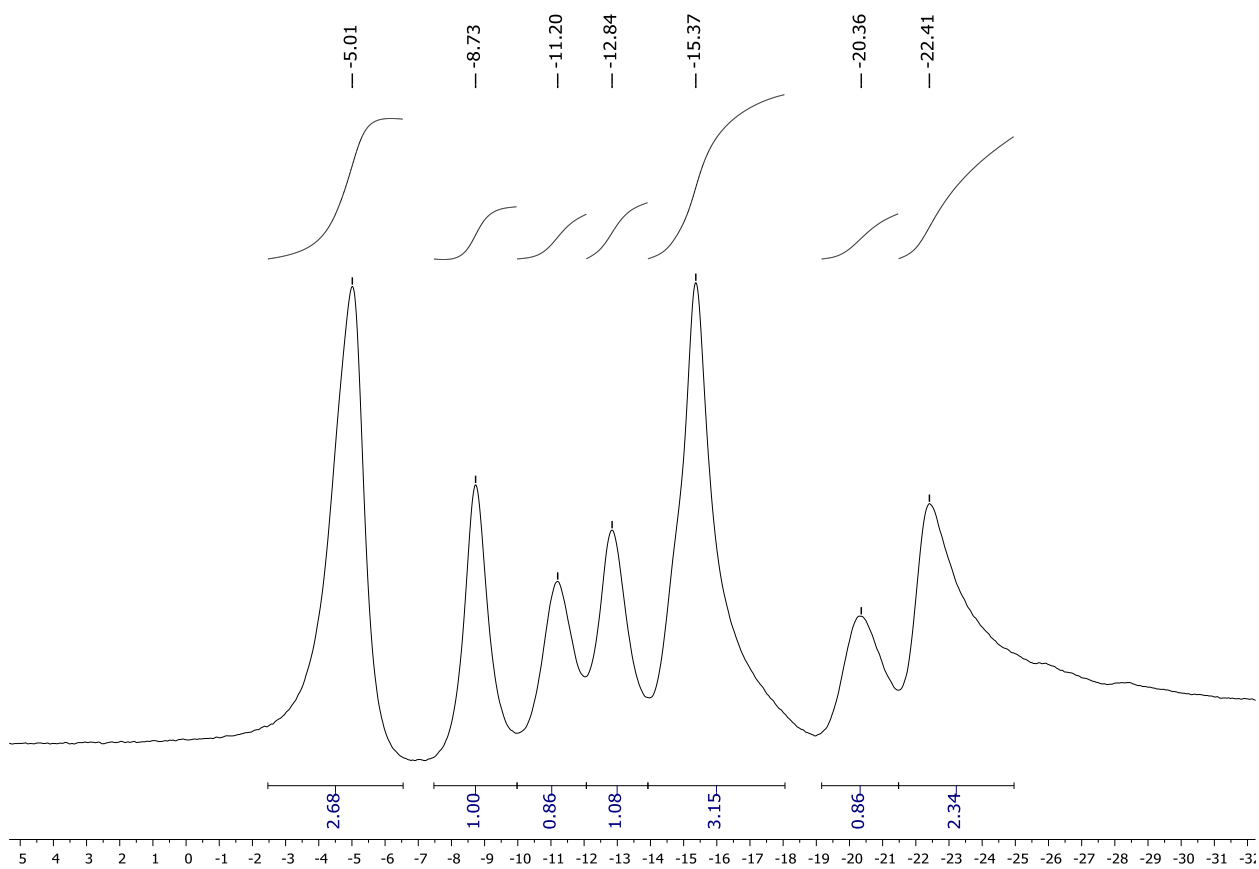

**Fig. S31.**  $^{11}\text{B}\{^1\text{H}\}$  NMR spectrum of compound **6** in acetone- $d_6$

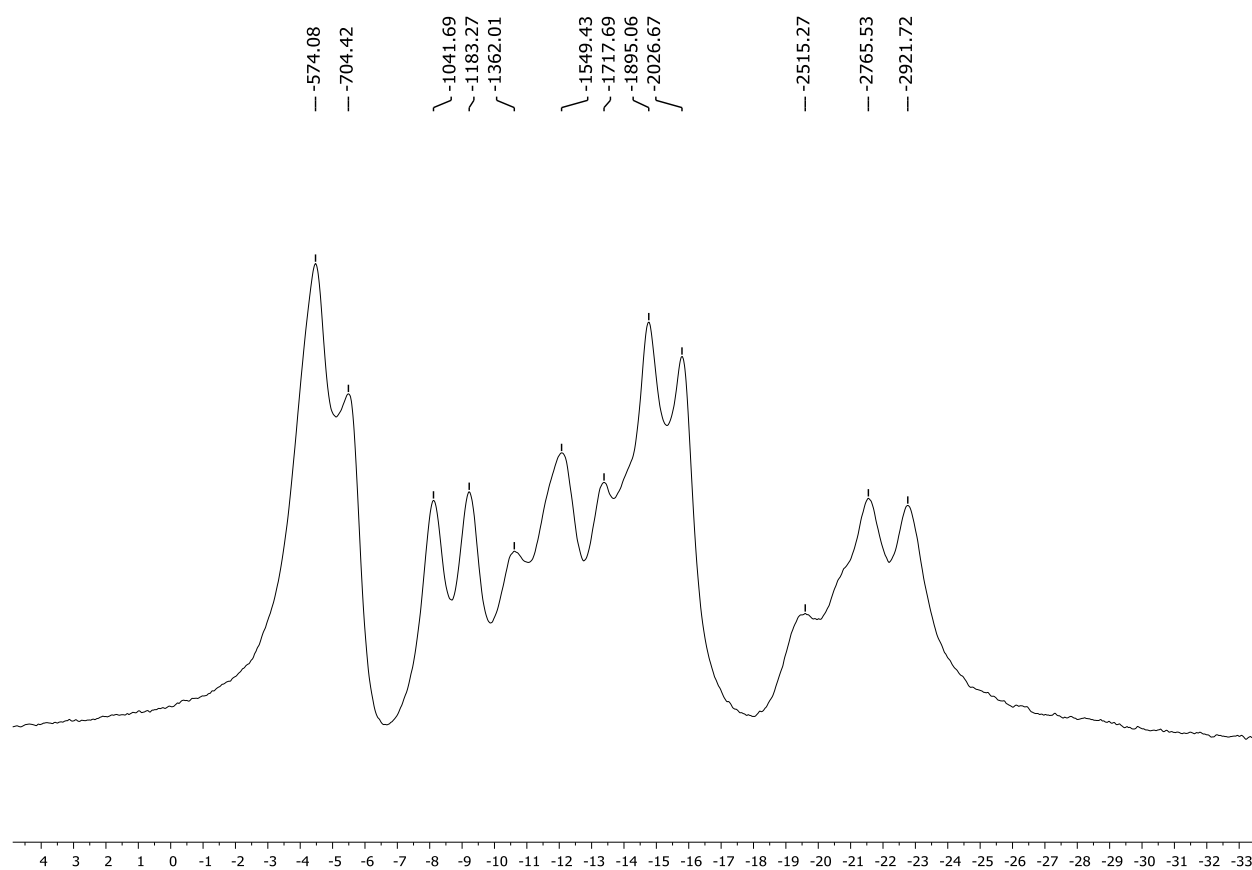

**Fig. S32.**  $^{11}\text{B}$  NMR spectrum of compound **6** in acetone- $\text{d}_6$

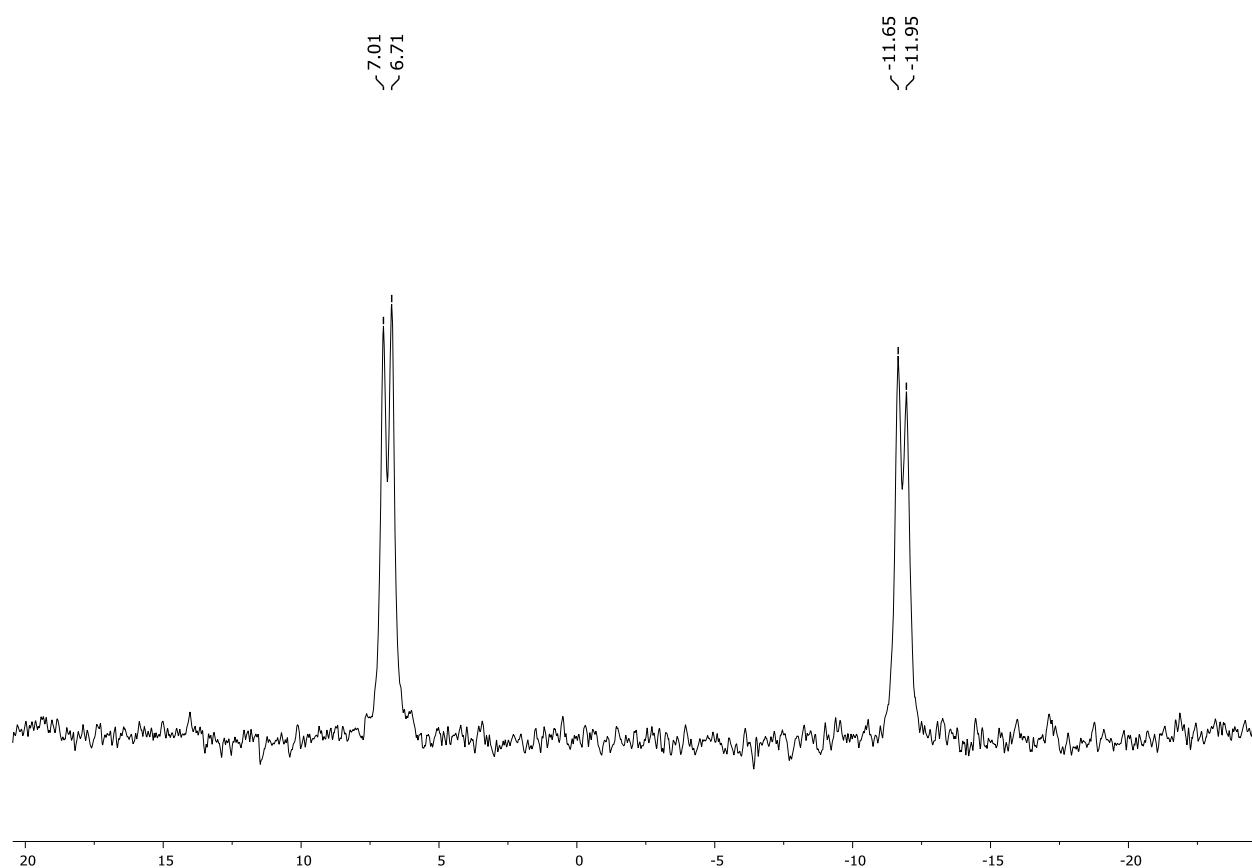

**Fig. S33.**  $^{31}\text{P}\{^1\text{H}\}$  NMR spectrum of compound **6** in acetone- $\text{d}_6$

**Spectral data for 3,3-(MePh<sub>2</sub>P)<sub>2</sub>-1-(MeO(CH<sub>2</sub>)<sub>2</sub>S)-*clos*-3,1,2-NiC<sub>2</sub>B<sub>9</sub>H<sub>10</sub> (7)**

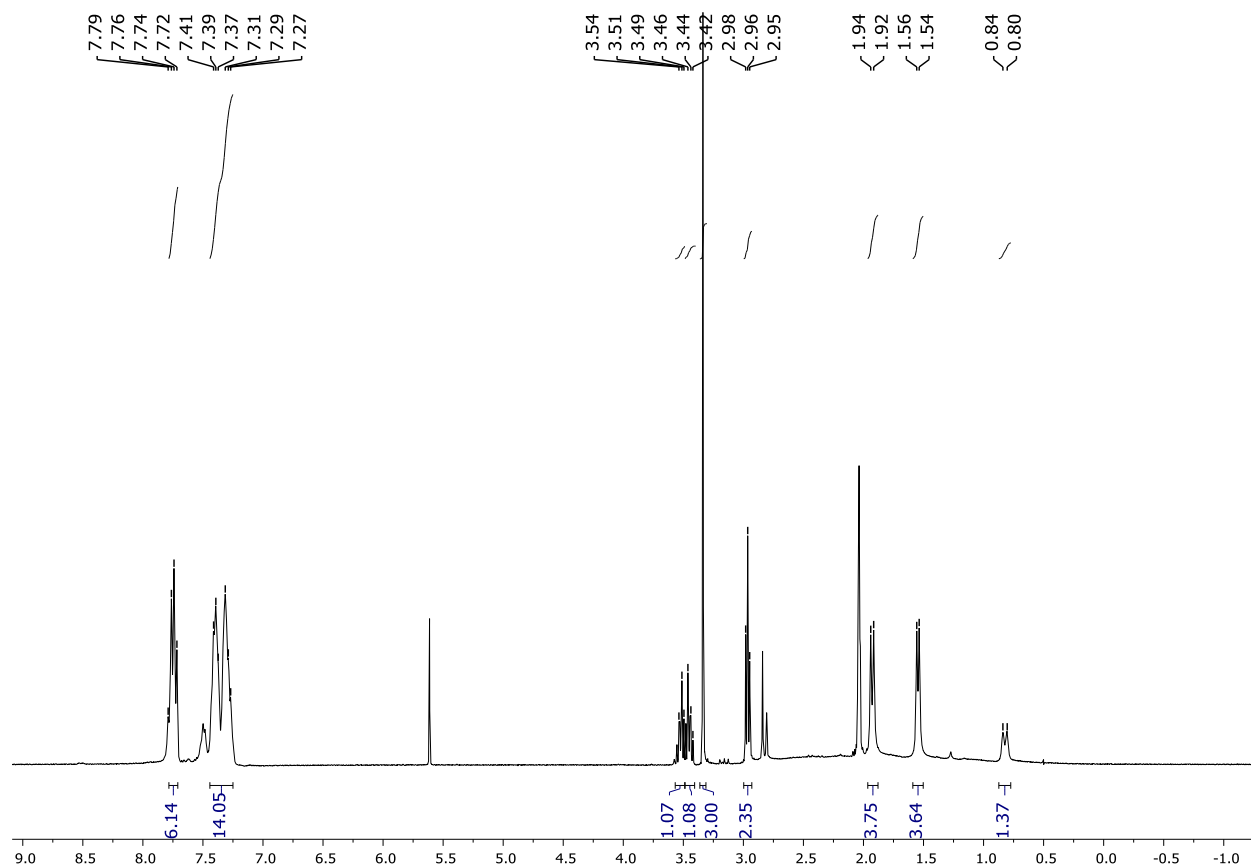

**Fig. S34.** <sup>1</sup>H NMR spectrum of compound **7** in acetone-d<sub>6</sub>

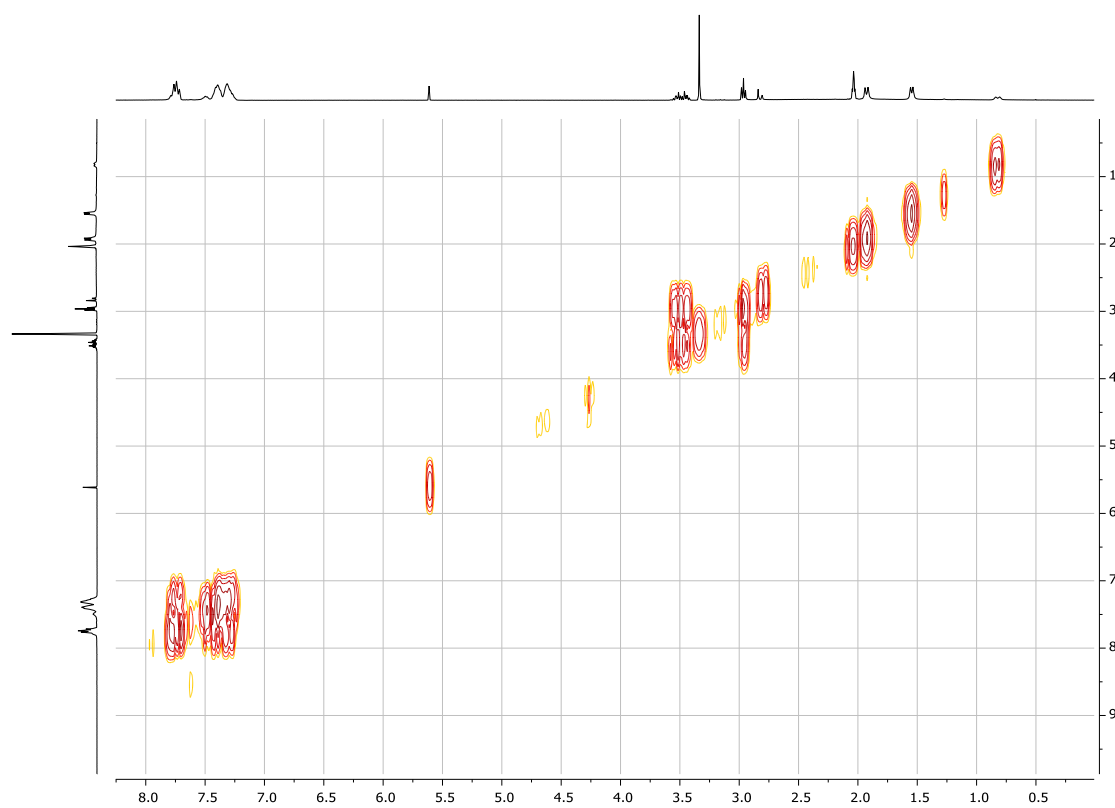

**Fig. S35.** (H,H) COSY NMR spectrum of compound **7** in acetone-d<sub>6</sub>



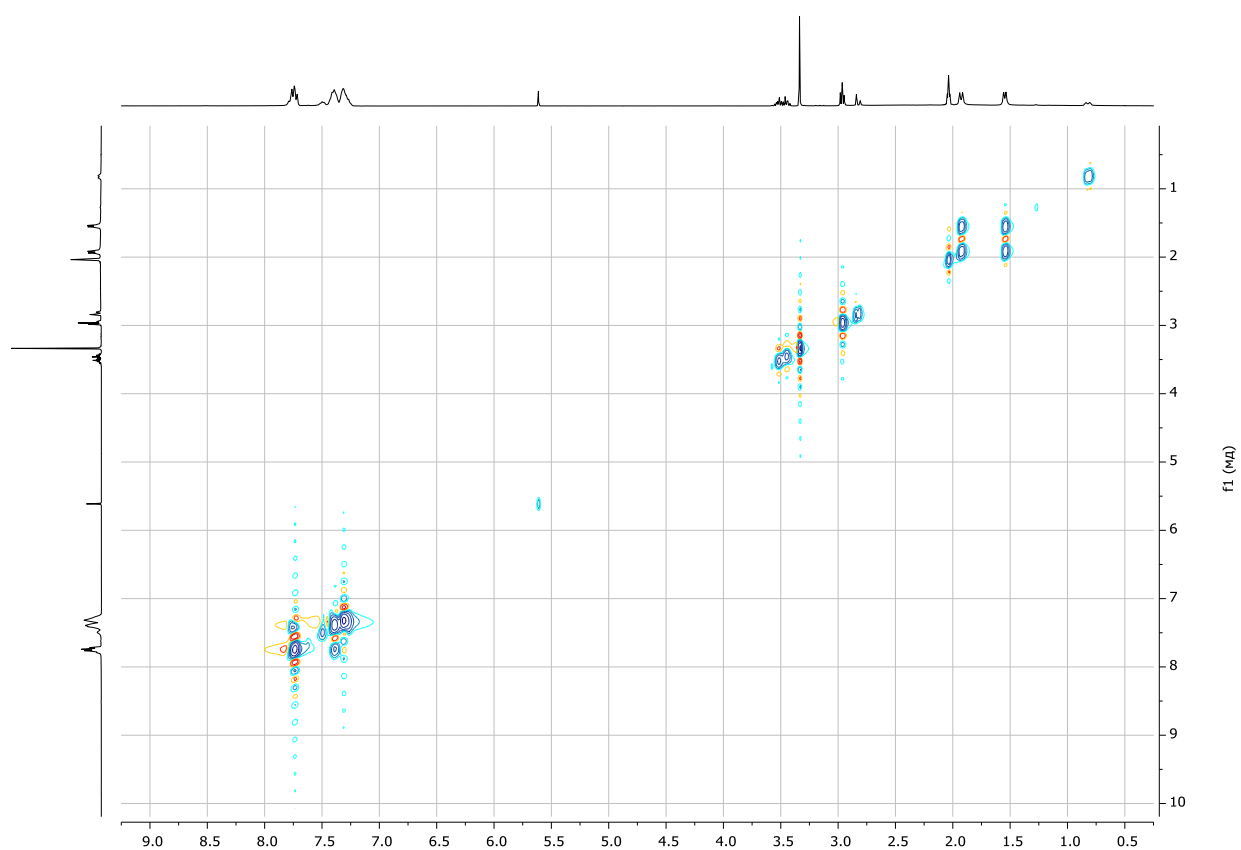

**Fig. S36.** NOESY NMR spectrum of compound **7** in acetone- $d_6$

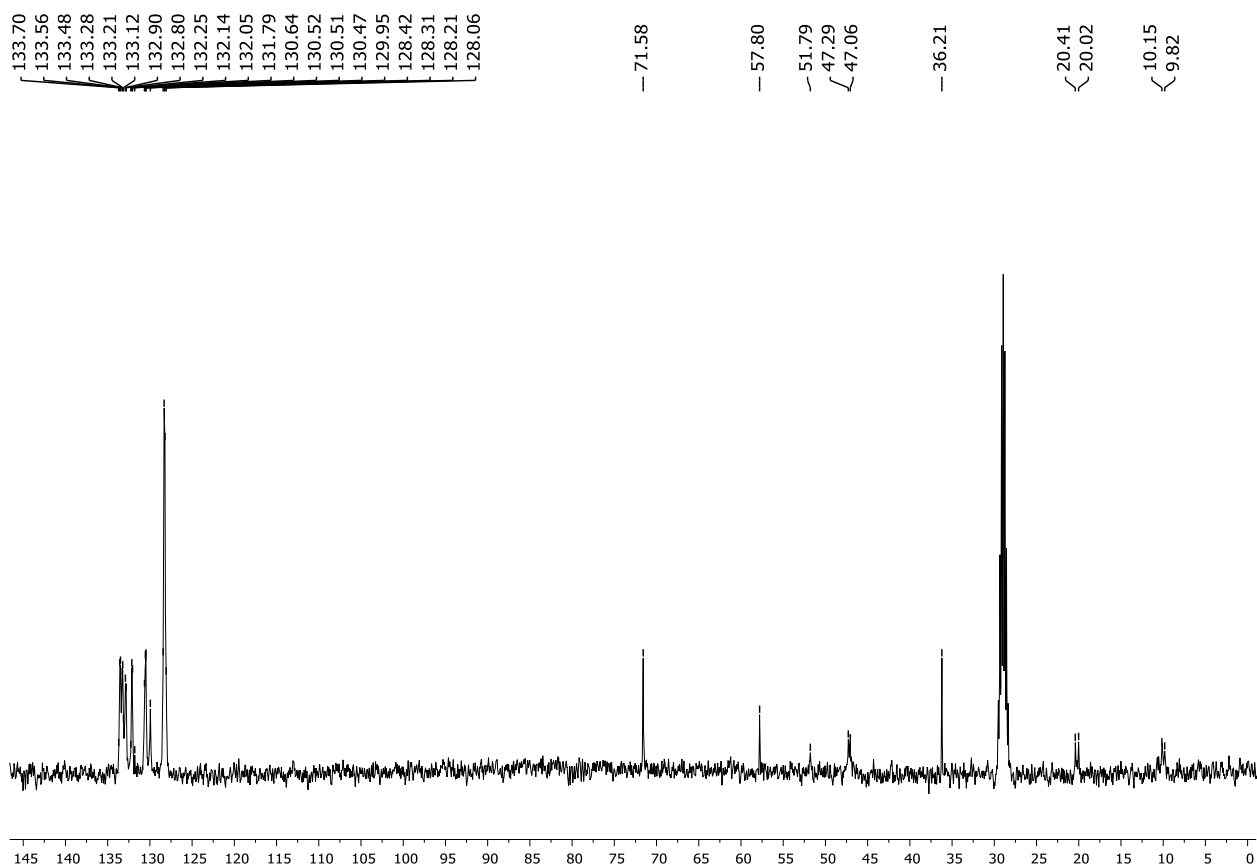

**Fig. S37.**  $^{13}\text{C}$  NMR spectrum of compound **7** in acetone- $d_6$

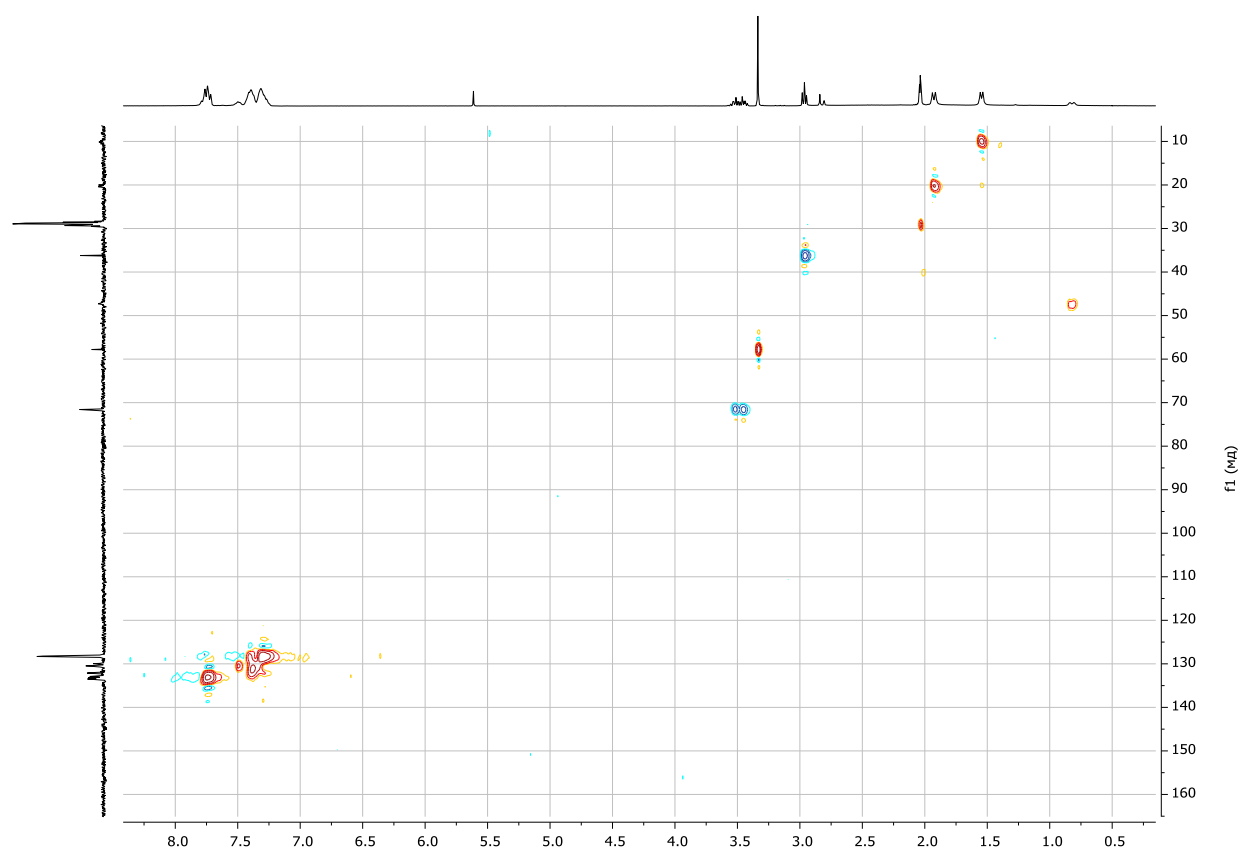

**Fig. S38.** (HC) HSQC NMR spectrum of compound **7** in acetone- $d_6$

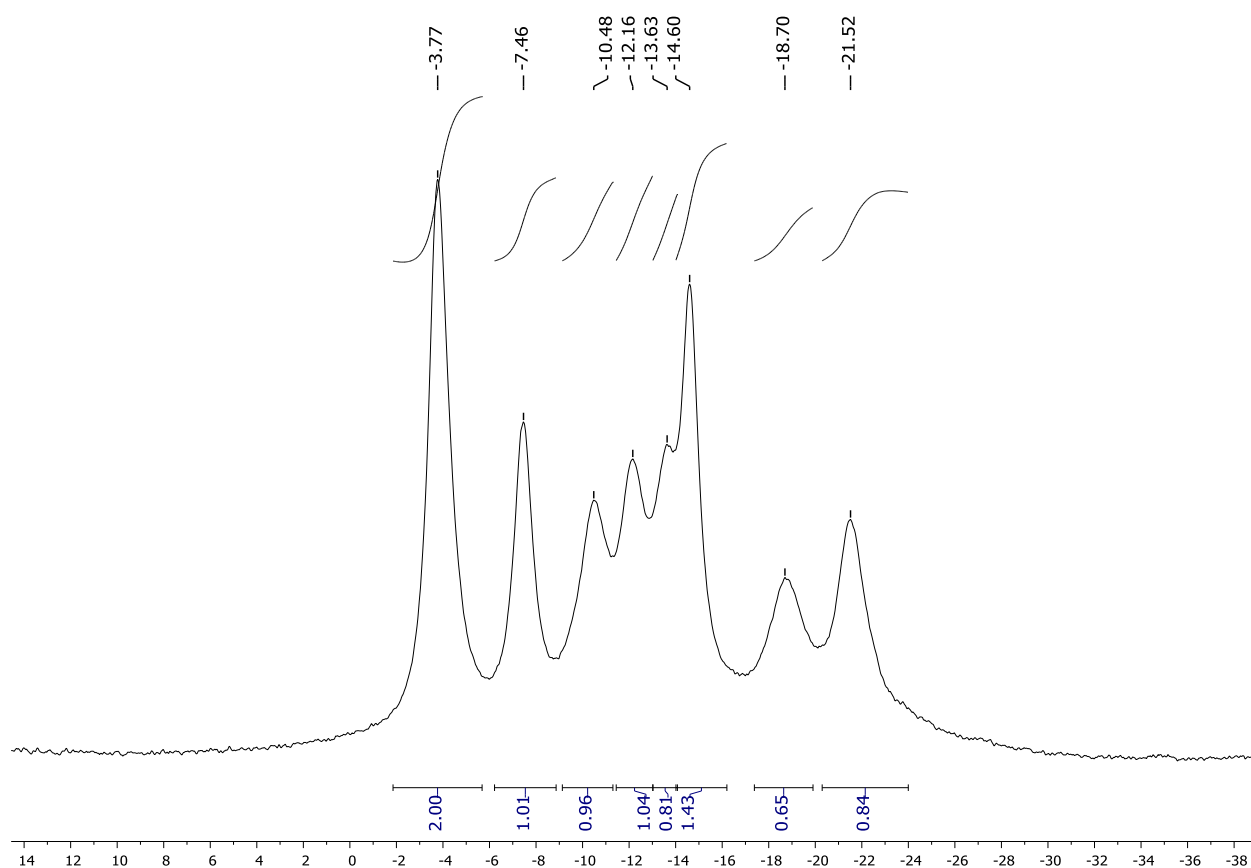

**Fig. S39.**  $^{11}\text{B}\{^1\text{H}\}$  NMR spectrum of compound **7** in acetone- $d_6$

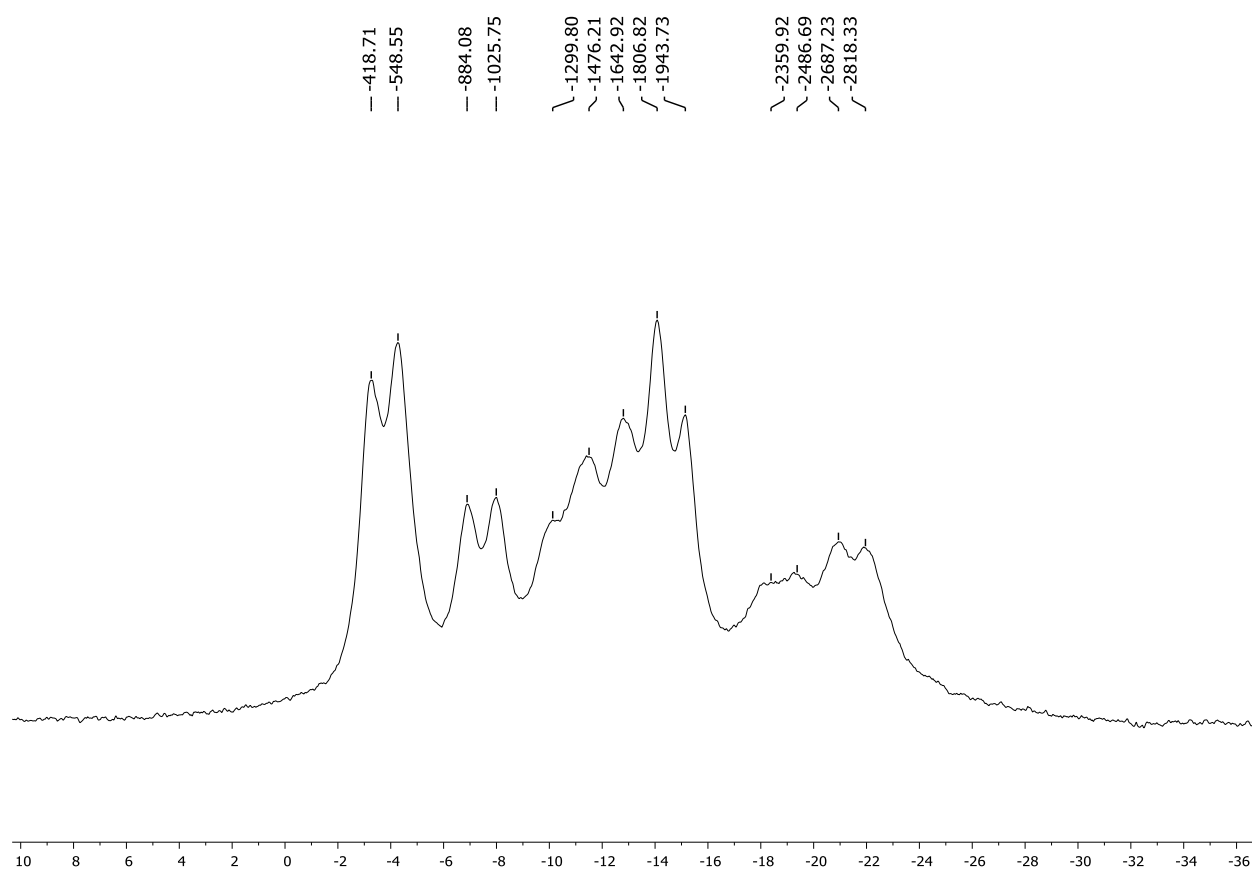

**Fig. S40.**  $^{11}\text{B}$  NMR spectrum of compound **7** in acetone- $\text{d}_6$

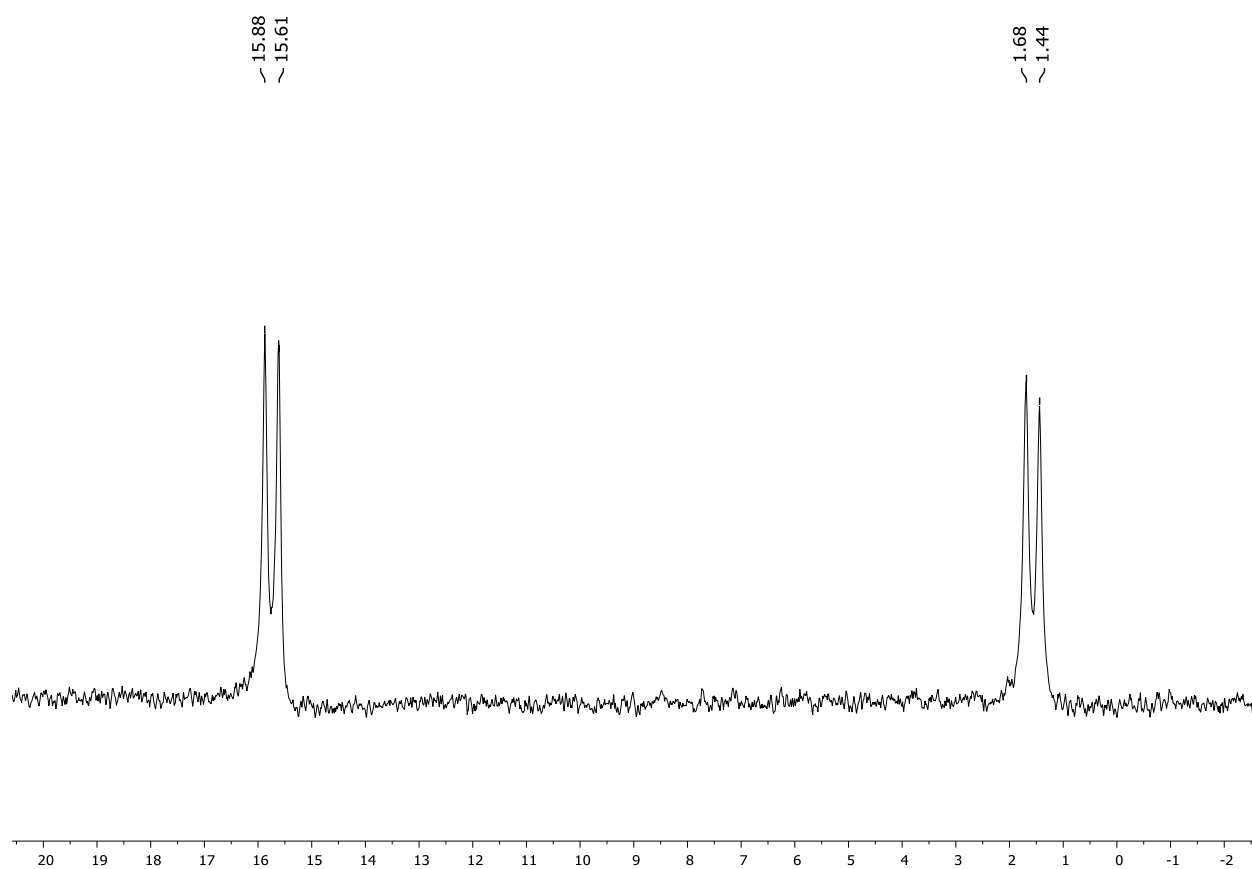

**Fig. S41.**  $^{31}\text{P}\{^1\text{H}\}$  NMR spectrum of compound **7** in acetone- $\text{d}_6$

**Spectral data for 3,3-(EtPh<sub>2</sub>P)<sub>2</sub>-1-(MeO(CH<sub>2</sub>)<sub>2</sub>S)-*closo*-3,1,2-NiC<sub>2</sub>B<sub>9</sub>H<sub>10</sub> (8)**

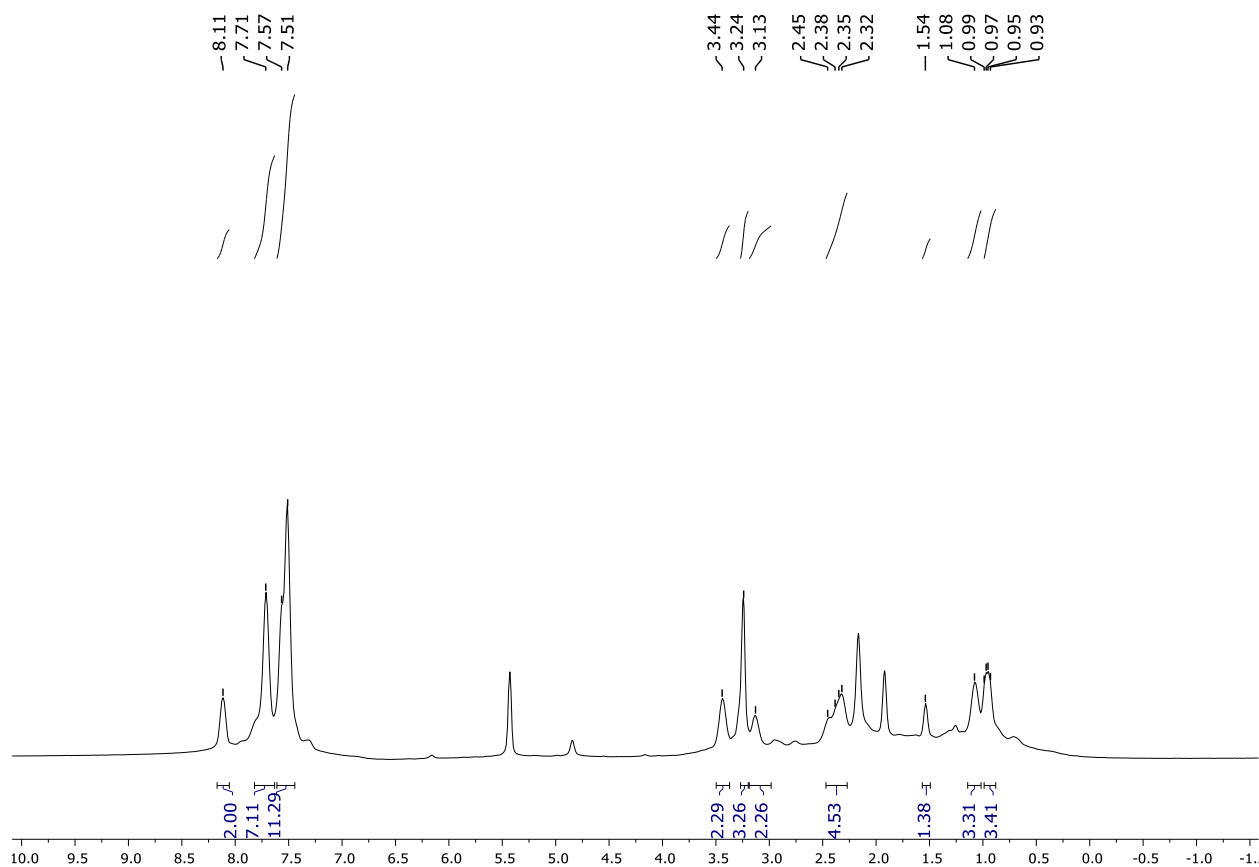

**Fig. S42.** <sup>1</sup>H NMR spectrum of compound **8** in CD<sub>3</sub>CN

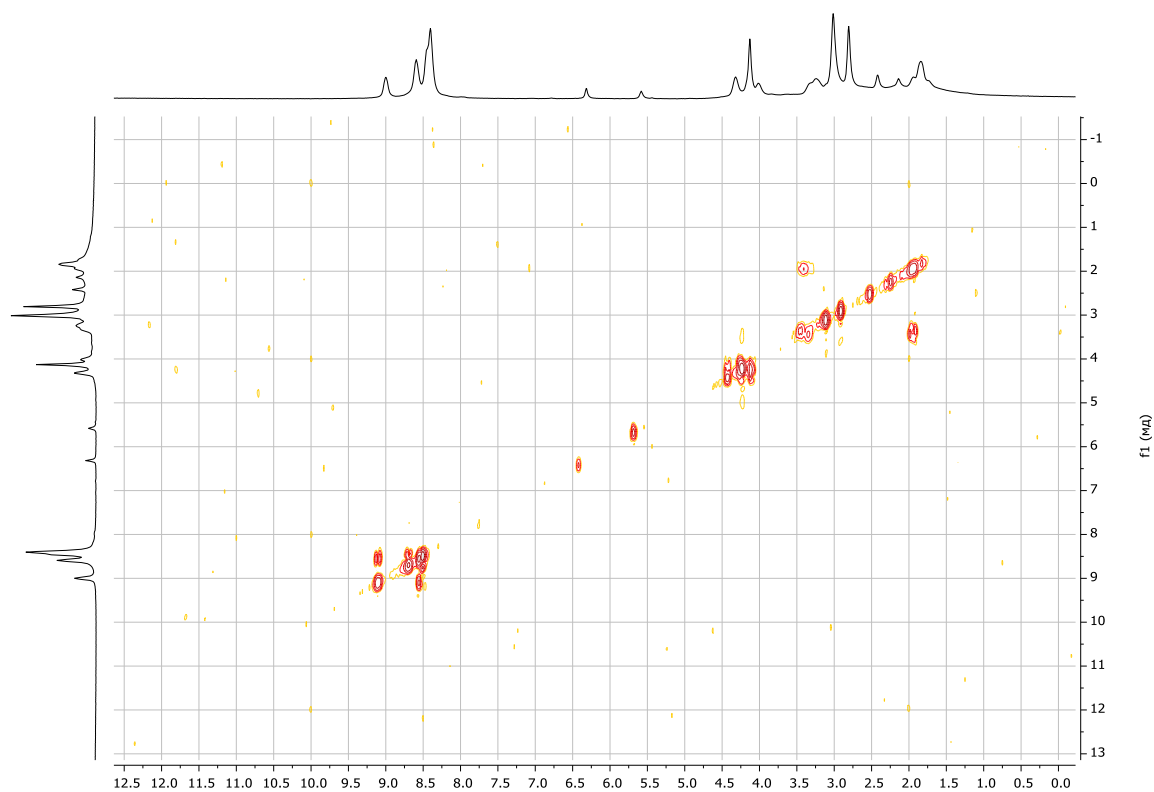

**Fig. S43.** A fragment of (HH) COSY NMR spectrum of compound **8** in CD<sub>3</sub>CN

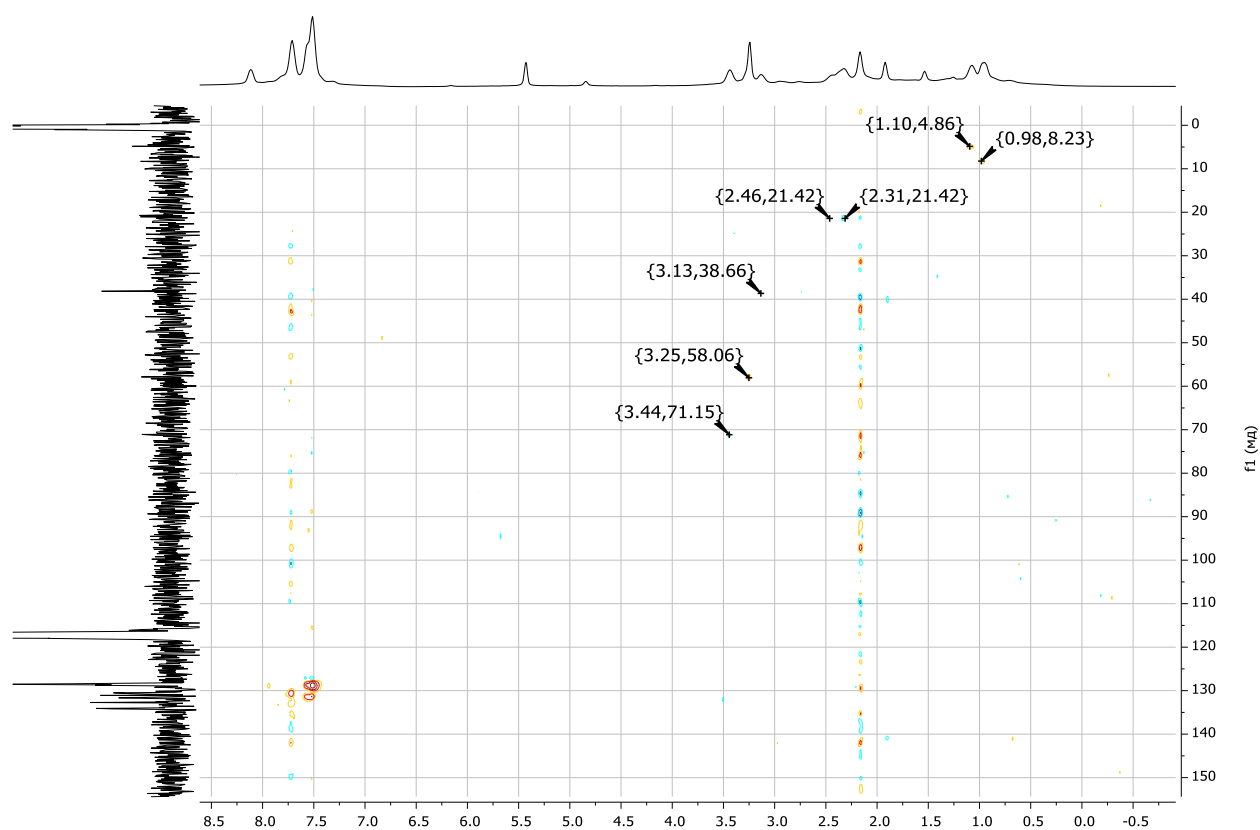

**Fig. S44.** (HC) HSQC NMR spectrum of compound **8** in CD<sub>3</sub>CN

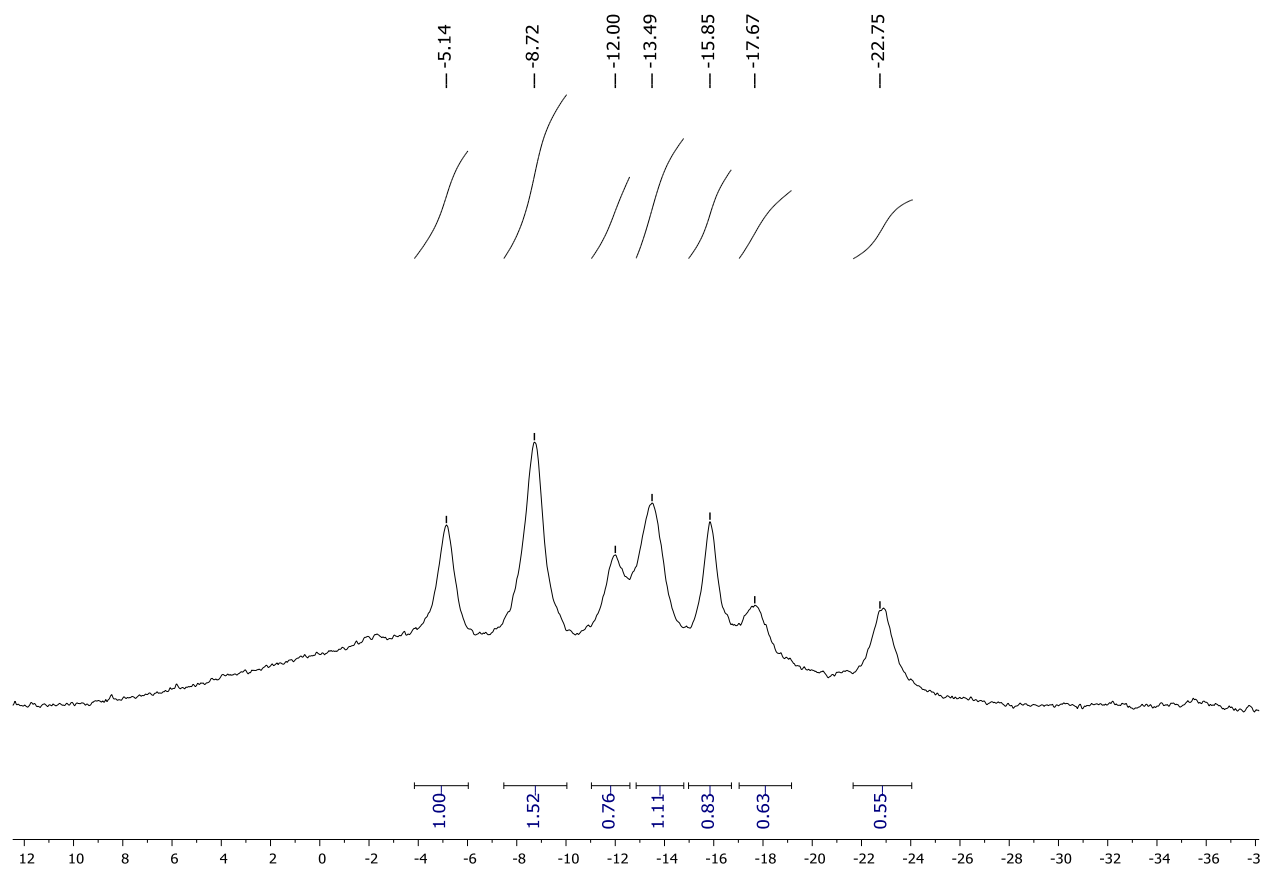

**Fig. S45.**  $^{11}\text{B}\{^1\text{H}\}$  NMR spectrum of compound **8** in CD<sub>3</sub>CN

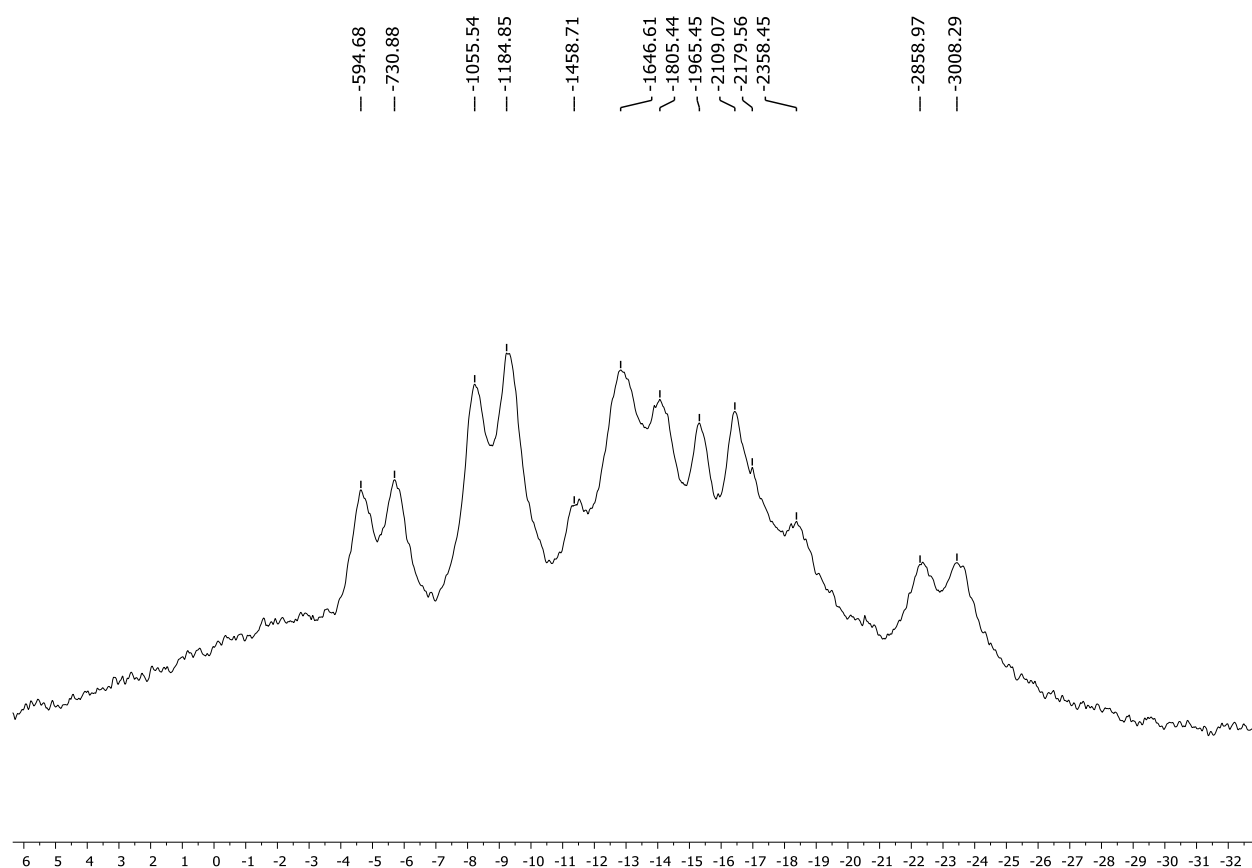

**Fig. S46.**  $^{11}\text{B}$  NMR spectrum of compound **8** in  $\text{CD}_3\text{CN}$

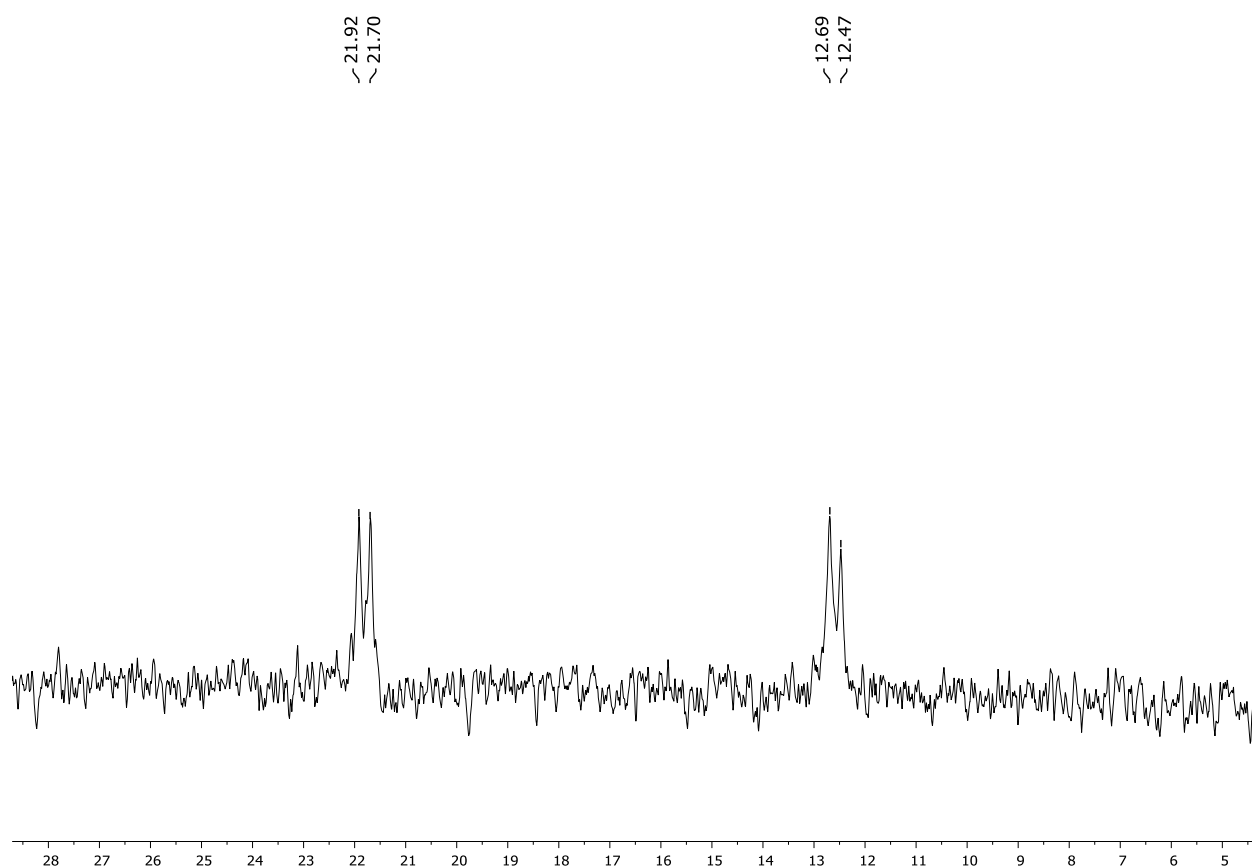

**Fig. S47.**  $^{31}\text{P}\{^1\text{H}\}$  NMR spectrum of compound **8** in acetone- $\text{d}_6$

Spectral data for 3,3-(Bu<sub>3</sub>P)<sub>2</sub>-1-(MeO(CH<sub>2</sub>)<sub>2</sub>S)-*closo*-3,1,2-NiC<sub>2</sub>B<sub>9</sub>H<sub>10</sub> (9)

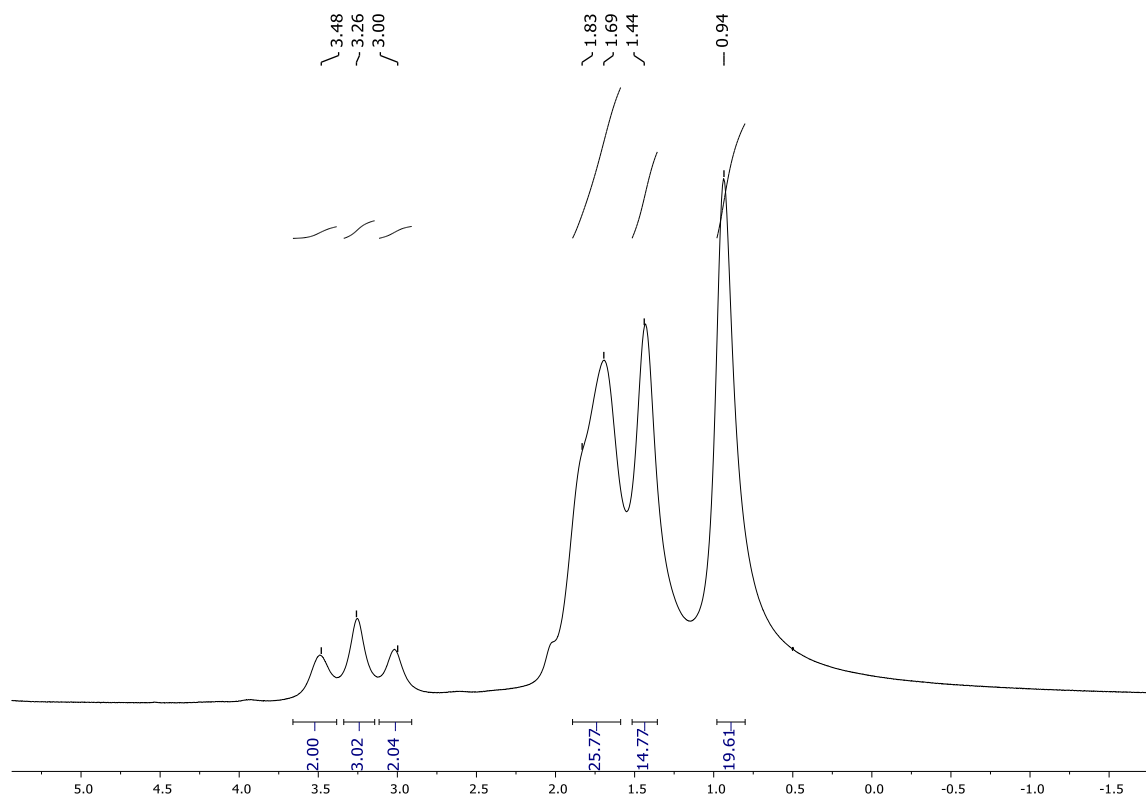

**Fig. S48.** <sup>1</sup>H NMR spectrum of compound **9** in acetone-d<sub>6</sub>

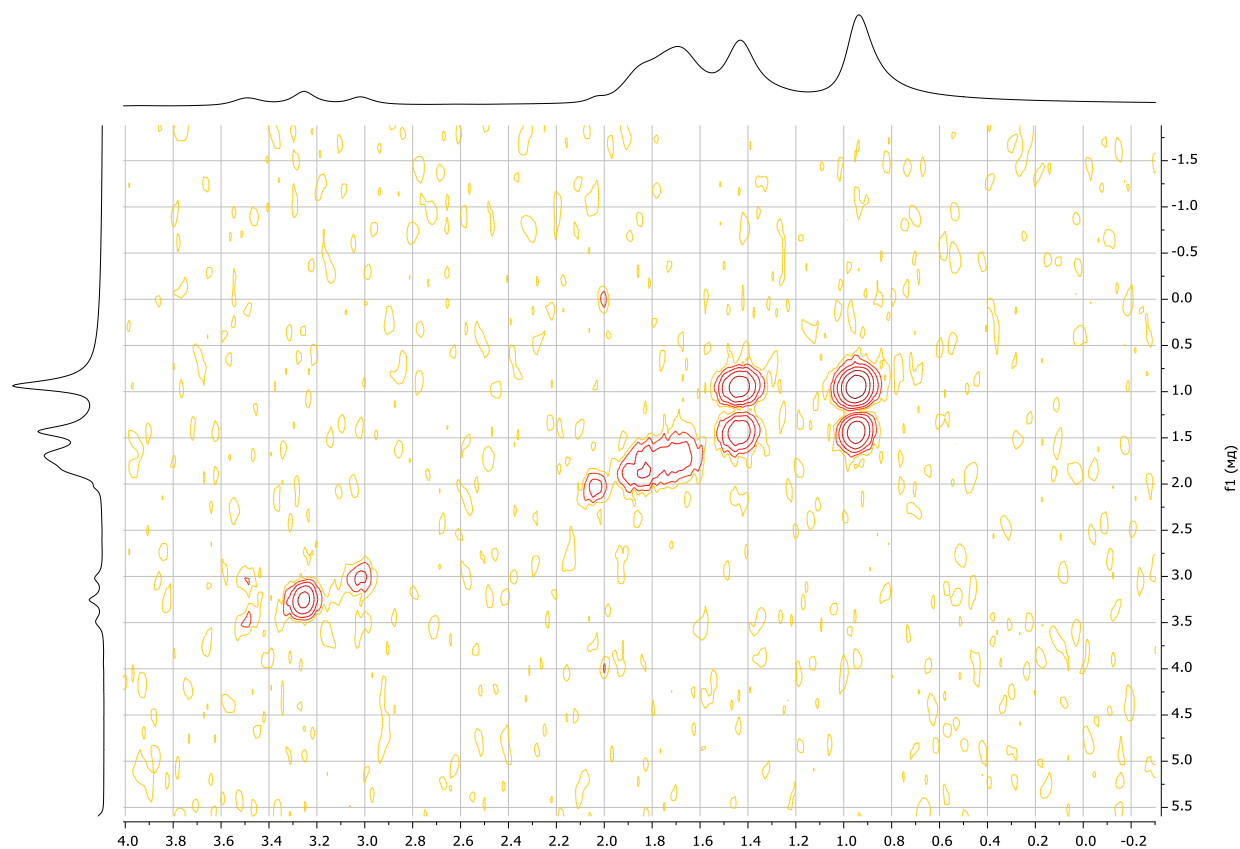

**Fig. S49.** (H,H) COSY NMR spectrum of compound **9** in acetone-d<sub>6</sub>

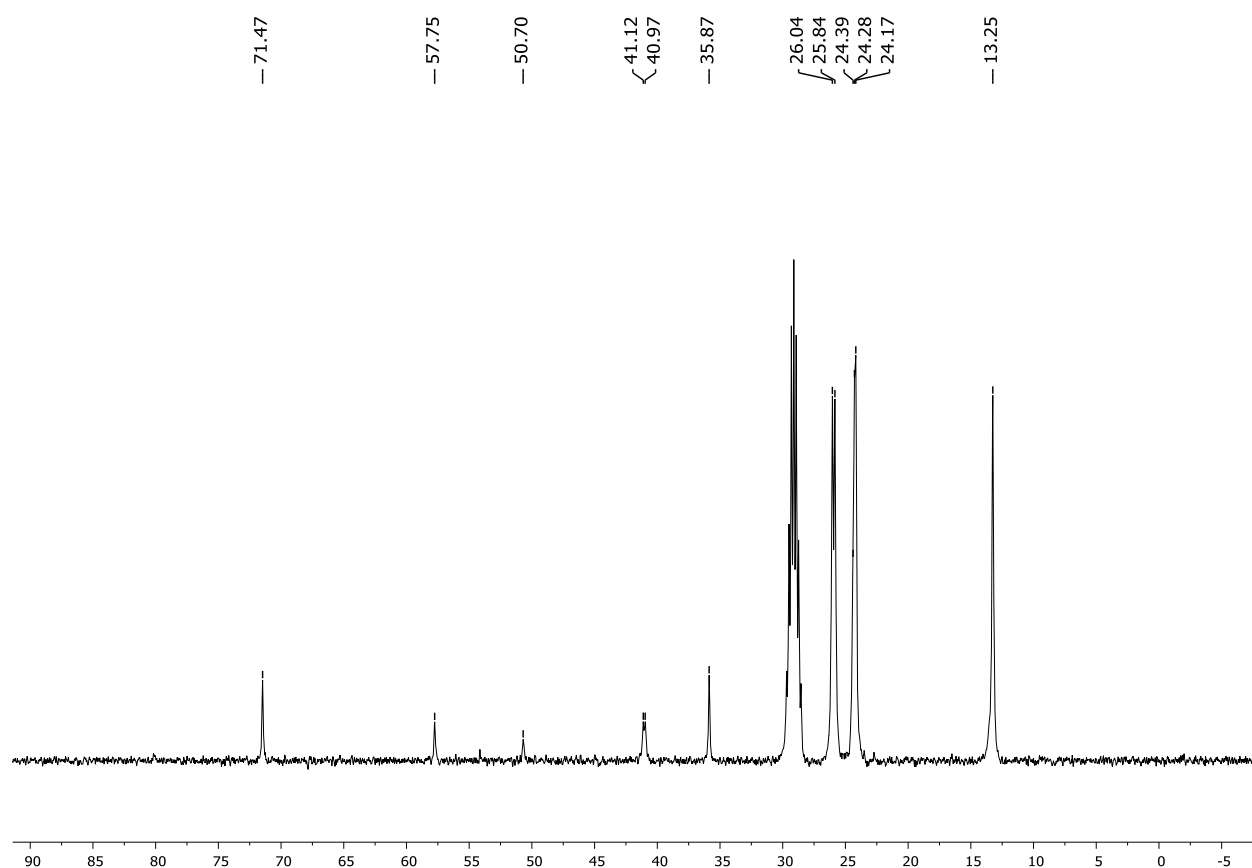

**Fig. S50.**  $^{13}\text{C}$  NMR spectrum of compound **9** in acetone- $\text{d}_6$

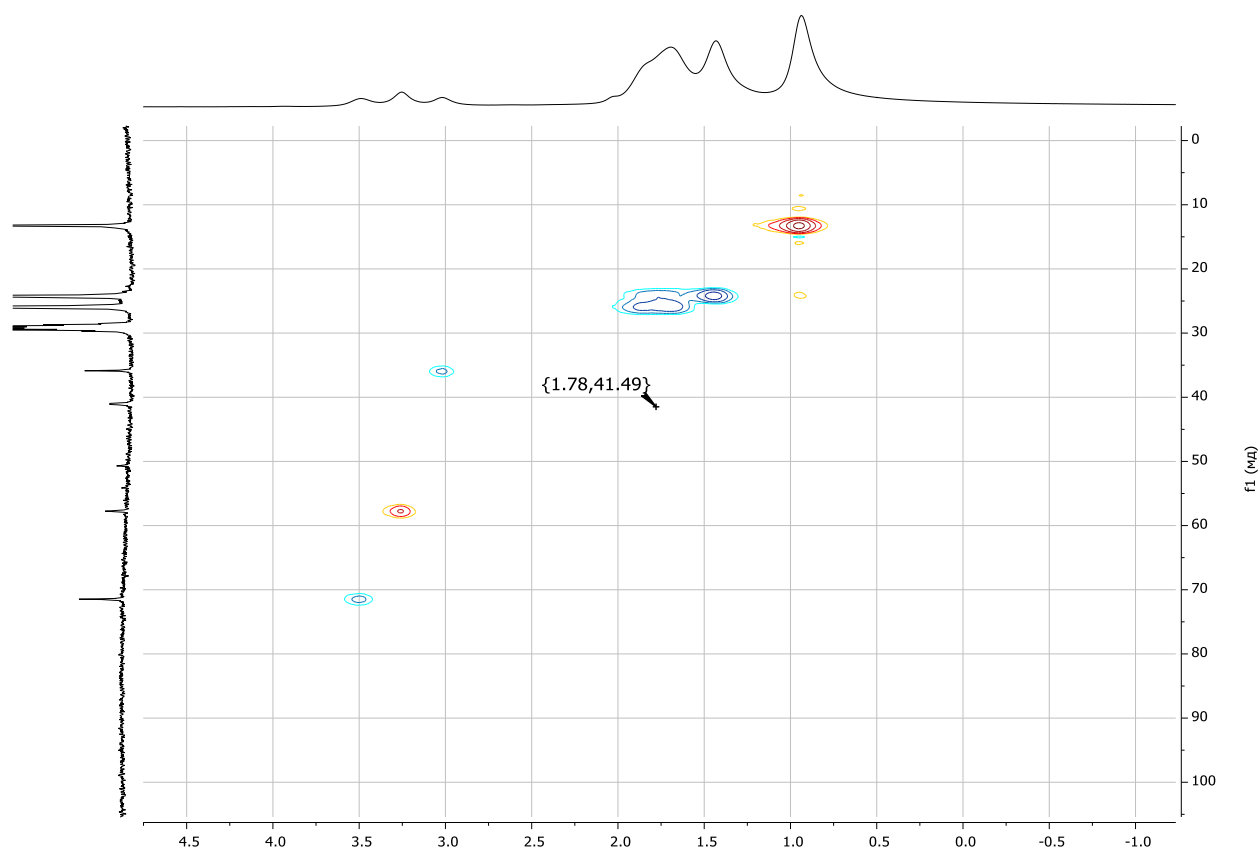

**Fig. S51.** (H)C HSQC NMR spectrum of compound **9** in acetone- $\text{d}_6$



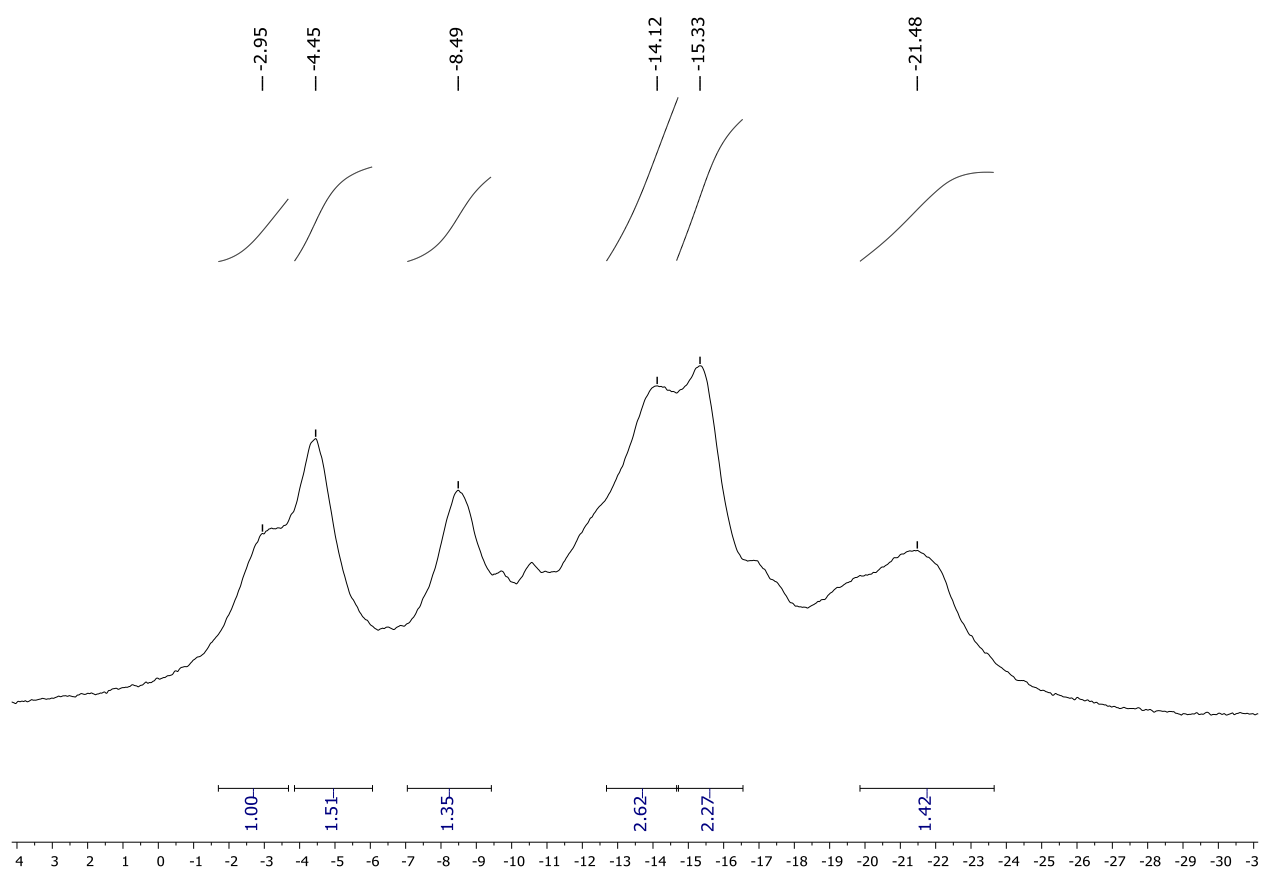

**Fig. S52.**  $^{11}\text{B}\{^1\text{H}\}$  NMR spectrum of compound **9** in acetone- $\text{d}_6$

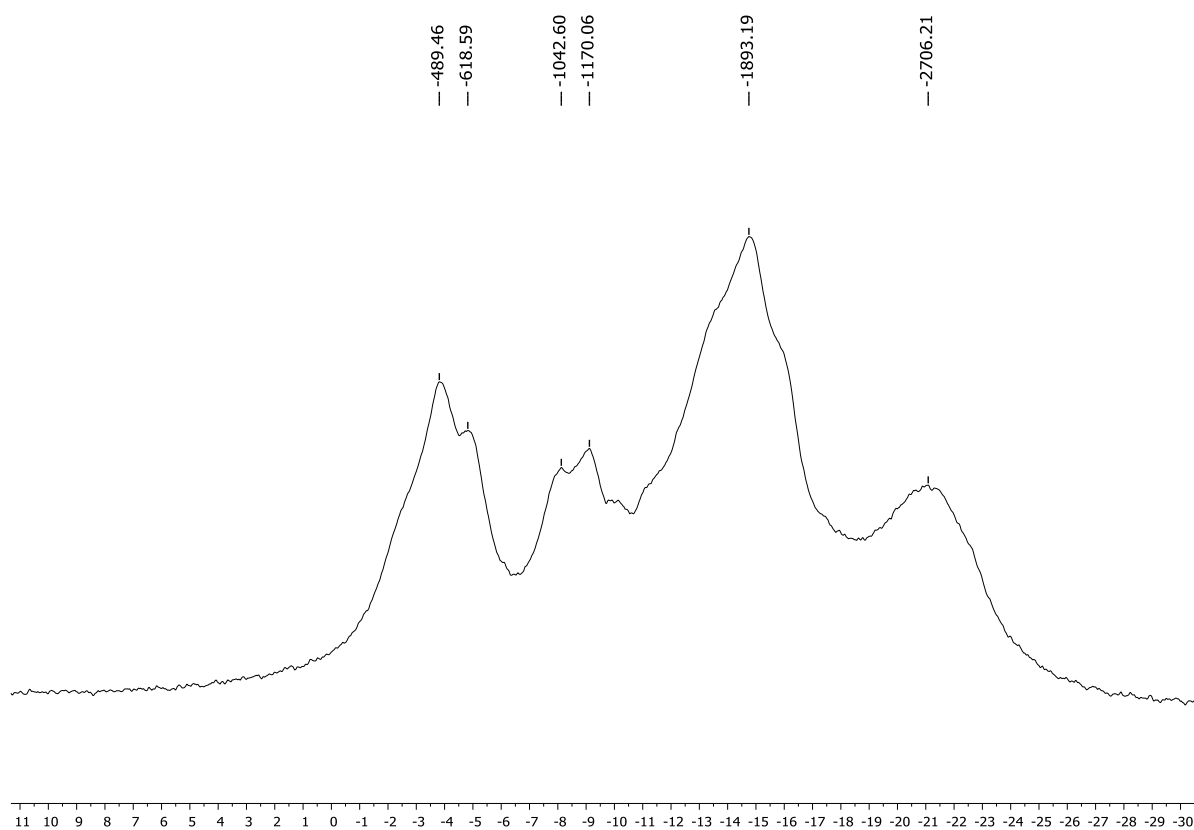

**Fig. S53.**  $^{11}\text{B}$  NMR spectrum of compound **9** in acetone- $\text{d}_6$

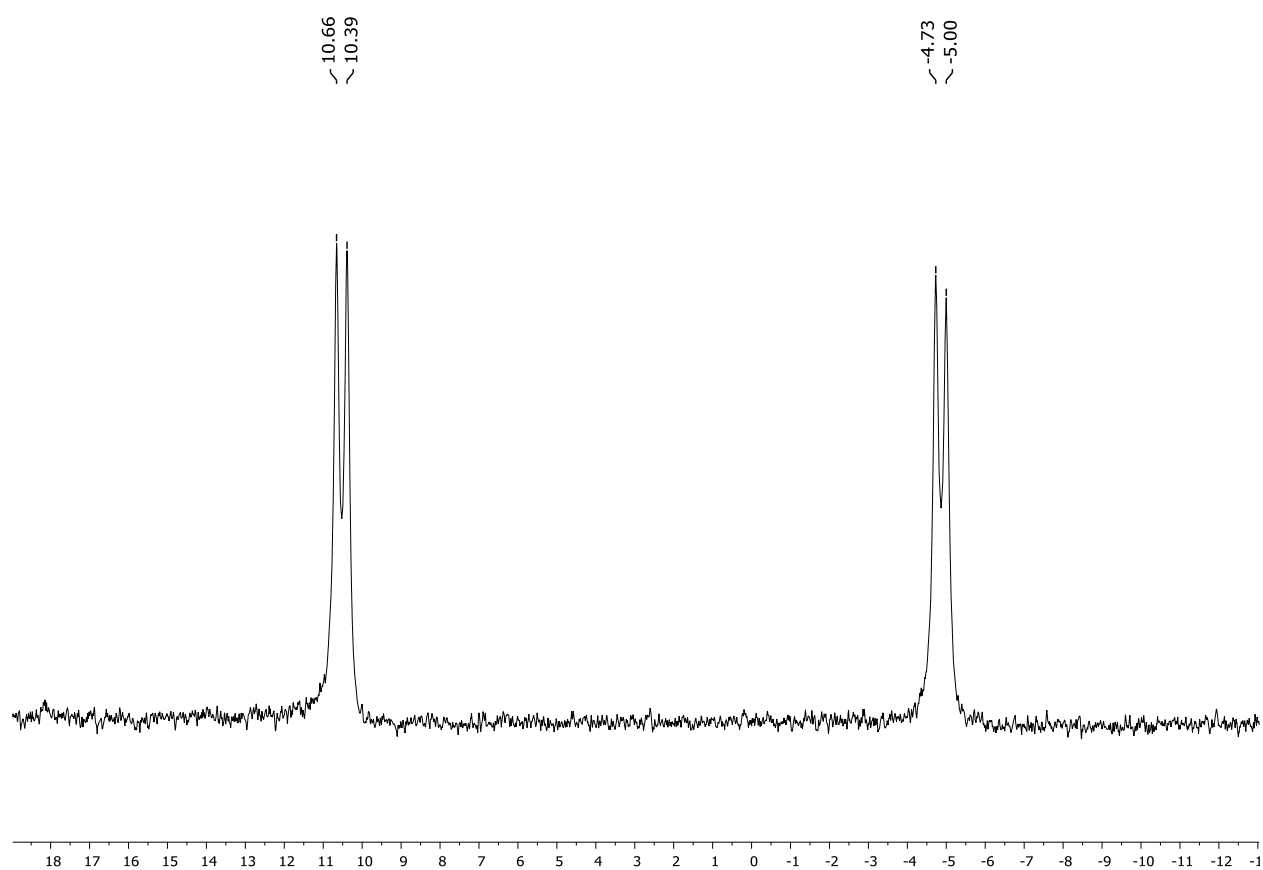

**Fig. S54.**  $^{31}\text{P}$  NMR spectrum of compound **9** in acetone- $\text{d}_6$
